# Supplementary material for: Chronic Rhinosinusitis with Nasal Polyps: A Survey on Routine Management and Evaluation of Disease Control in Practice
Source: MDPI journal article supplement (doi:10.3390/jpm13111531), 2023-10-26
Supplement: s1 [file s1]

## D1 Specialist's Age

Responses: 117 Skipped: 0

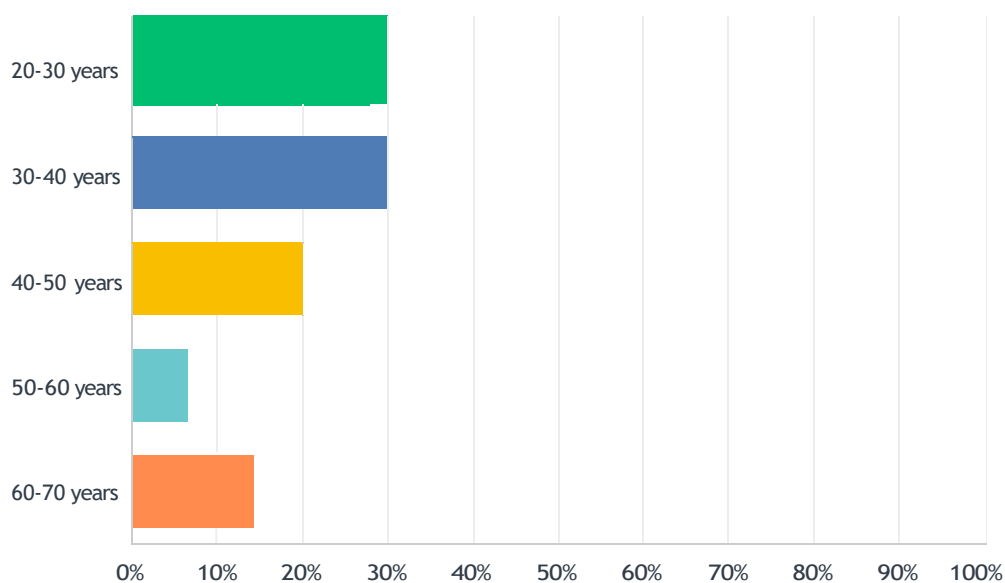

| RESPONSE OPTIONS | RESPONSES |     |
|------------------|-----------|-----|
| 20-30 years      | 28.21%    | 33  |
| 30-40 years      | 29.91%    | 35  |
| 40-50 years      | 20.51%    | 24  |
| 50-60 years      | 6.84%     | 8   |
| 60-70 years      | 14.53%    | 17  |
| TOTAL RESPONDERS |           | 117 |

D2 Gender

Responses: 117      Skipped: 0

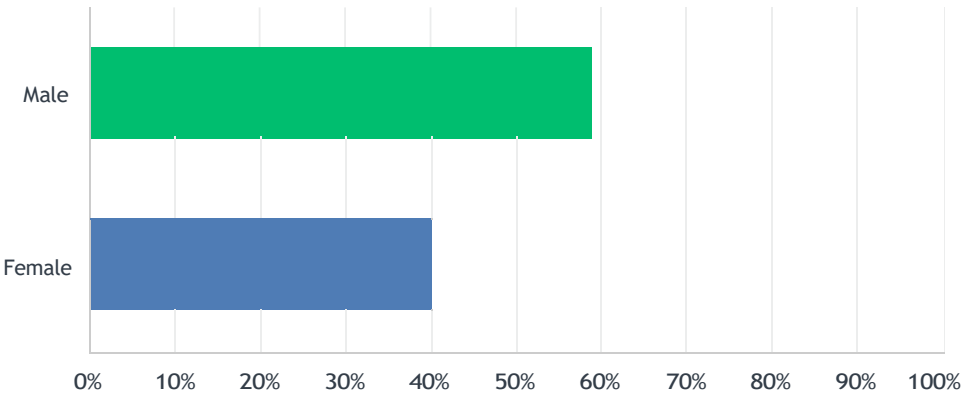

| RESPONSE OPTIONS | RESPONSES |     |
|------------------|-----------|-----|
| Male             | 58.97%    | 69  |
| Female           | 41.03%    | 48  |
| TOTAL RESPONDERS |           | 117 |

## D3 I'm ...

Responses: 117

Skipped: 0

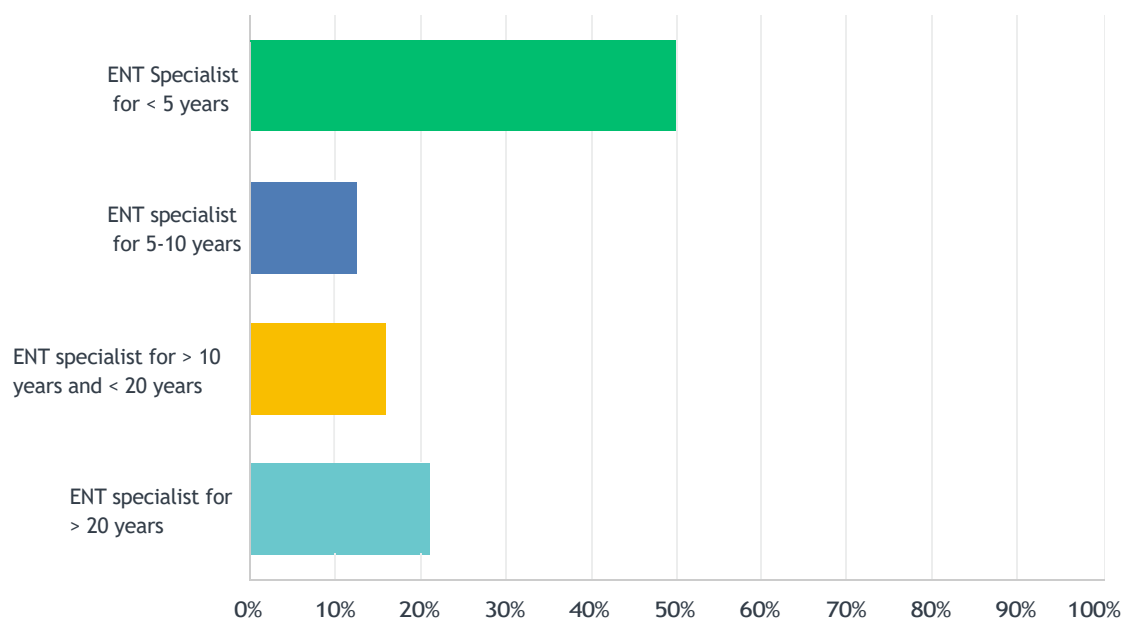

| RESPONSE OPTIONS                                             | RESPONSES |     |
|--------------------------------------------------------------|-----------|-----|
| ENT specialist for less than 5 years                         | 49.57%    | 58  |
| ENT specialist for 5 -10 years                               | 12.82%    | 15  |
| ENT specialist for more than 10 years and less than 20 years | 16.24%    | 19  |
| ENT specialist for more than 20 years                        | 21.37%    | 25  |
| TOTAL RESPONDERS                                             |           | 117 |

## D4 I'm ENT specialist and I work at a:

Responses: 117

Skipped: 0

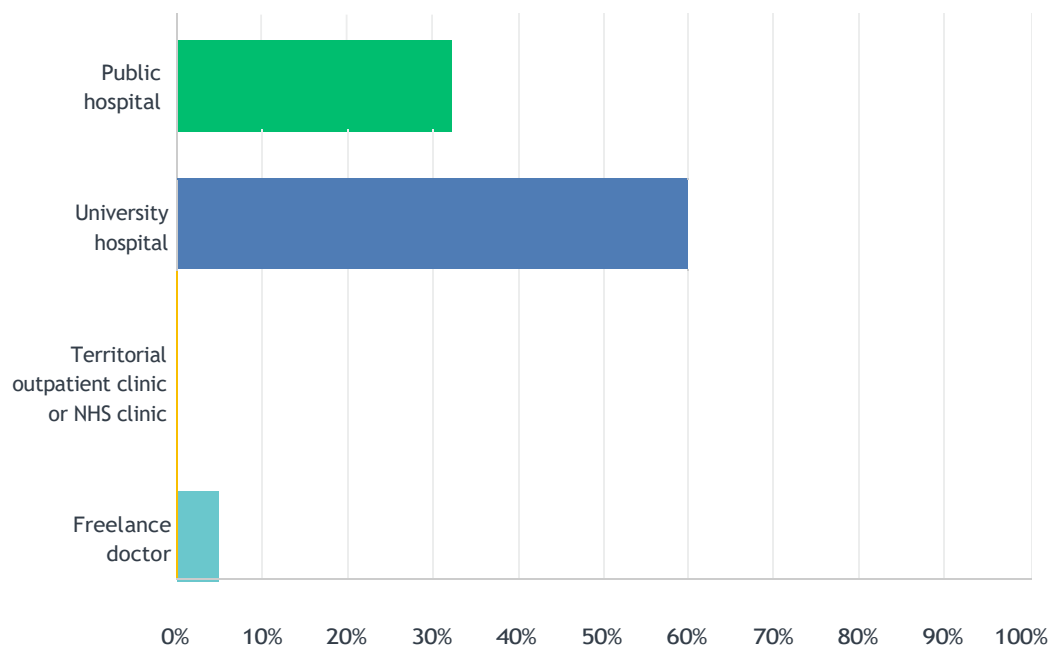

| RESPONSE OPTIONS                                       | RESPONSES |     |
|--------------------------------------------------------|-----------|-----|
| Public hospital                                        | 32.48%    | 38  |
| University Hospital                                    | 60.68%    | 71  |
| Territorial outpatient clinic or NHS outpatient clinic | 1.71%     | 2   |
| Freelance Doctor                                       | 5.13%     | 6   |
| TOTAL RESPONDERS                                       |           | 117 |

## D5 The facility where I work is located in:

Responses: 117

Skipped: 0

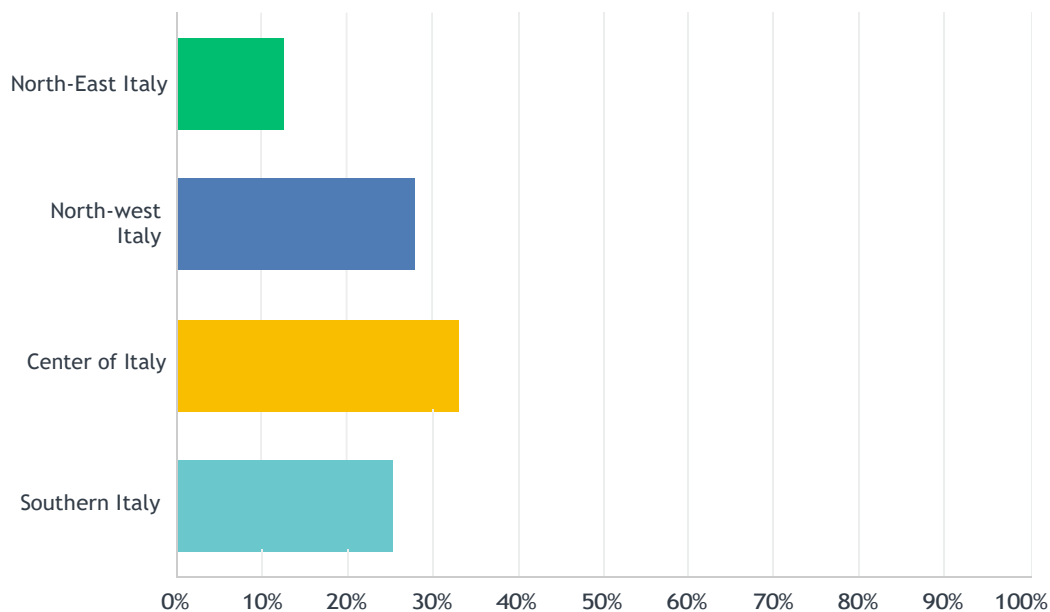

| RESPONSE OPTIONS | RESPONSES |     |
|------------------|-----------|-----|
| North-east Italy | 12.82%    | 15  |
| North-west Italy | 28.21%    | 33  |
| Center of Italy  | 33.33%    | 39  |
| Southern Italy   | 25.64%    | 30  |
| TOTAL RESPONDERS |           | 117 |

## D6 Regarding endoscopic sinus surgery:

Responses: 117

Skipped: 0

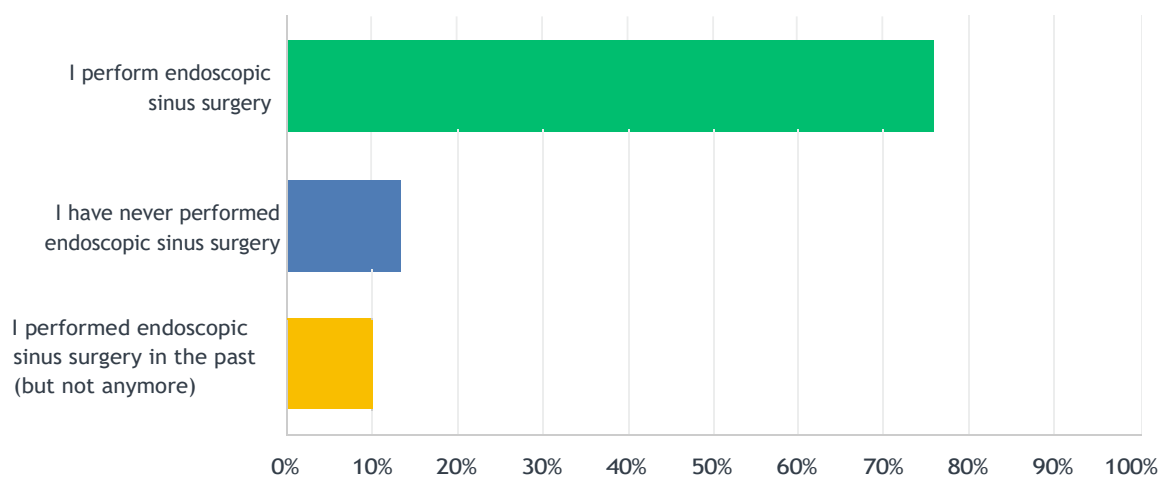

| RESPONSE OPTIONS                                                        | RESPONSES |     |
|-------------------------------------------------------------------------|-----------|-----|
| I perform endoscopic naso-sinus surgery                                 | 76.07%    | 89  |
| I have never performed endoscopic naso-sinus surgery                    | 13.68%    | 16  |
| I performed endoscopic naso-sinus surgery in the past (but not anymore) | 10.26%    | 12  |
| TOTAL RESPONDERS                                                        |           | 117 |

## D7 Which of the following better describe your center? (Multiple answers possible)

Responses: 117

Skipped: 0

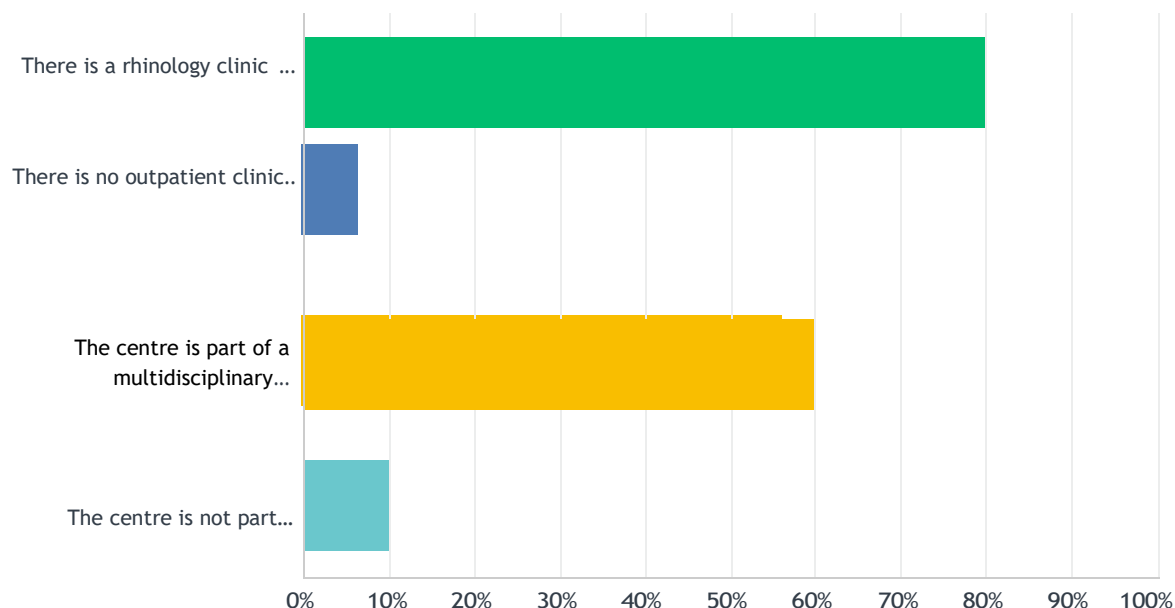

| RESPONSE OPTIONS                                                                                   | RESPONSES |            |
|----------------------------------------------------------------------------------------------------|-----------|------------|
| There is a rhinology clinic where patients with chronic recalcitrant rhinosinusitis are treated    | 79.49%    | 93         |
| There is no outpatient clinic where patients with chronic recalcitrant rhinosinusitis are treated  | 6.84%     | 8          |
| The center is part of a multidisciplinary collaboration network with allergists and pulmonologists | 56.41%    | 66         |
| The center is not part of a multidisciplinary collaboration network                                | 9.40%     | 11         |
| <b>TOTAL RESPONDERS</b>                                                                            |           | <b>117</b> |

## D8 In your clinical practice do you carry out specific assessment for disease control in chronic rhinosinusitis? (Multiple answers possible)

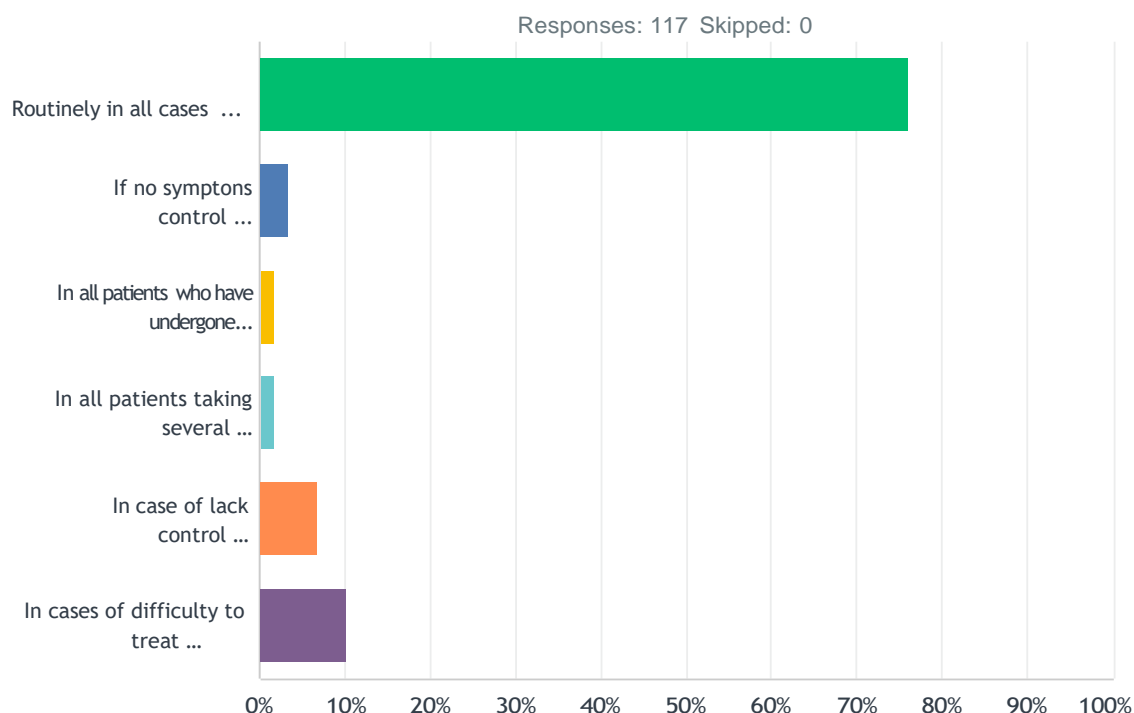

| RESPONSE OPTIONS                                                           | RESPONSES |     |
|----------------------------------------------------------------------------|-----------|-----|
| Routinely in all cases of polyposis                                        | 76.07%    | 89  |
| If no symptom control after surgery                                        | 3.42%     | 4   |
| In all patients who have undergone multiple surgeries                      | 1.71%     | 2   |
| In all patients taking several courses of systemic corticosteroids         | 1.71%     | 2   |
| In cases of difficult to treat CRSwNP in candidates for biological therapy | 6.84%     | 8   |
|                                                                            | 10.26%    | 12  |
| TOTAL RESPONDERS                                                           |           | 117 |



## D9 In your routine clinical practice, what is the percentage of patients with severe CRSwNP who are not controlled by systemic corticosteroids?

Responses: 117

Skipped: 0

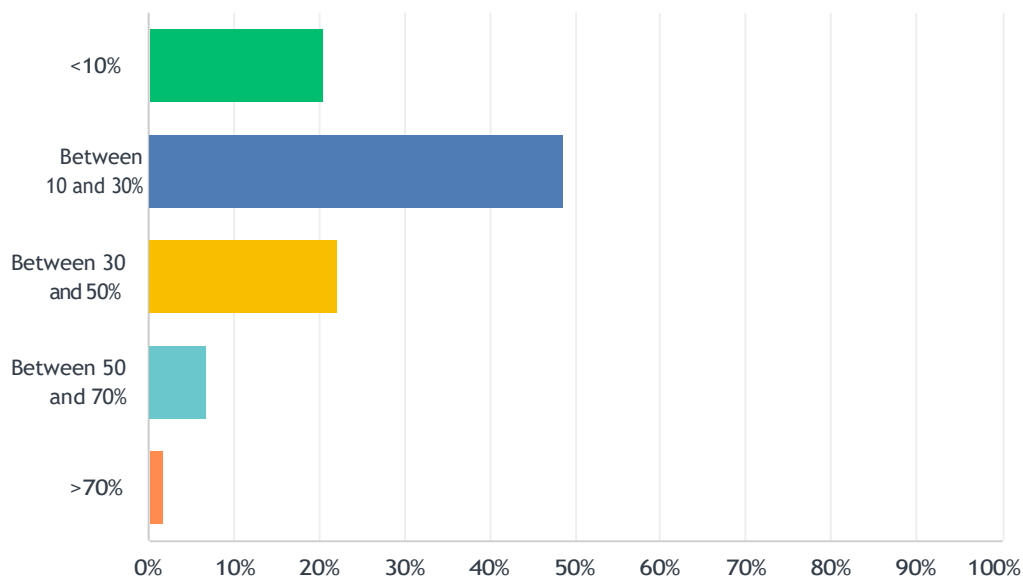

| RESPONSE OPTIONS   | RESPONSES |     |
|--------------------|-----------|-----|
| <10%               | 20.51%    | 24  |
| Between 10 and 30% | 48.72%    | 57  |
| Between 30 and 50% | 22.22%    | 26  |
| Between 50 and 70% | 6.84%     | 8   |
| >70%               | 1.71%     | 2   |
| TOTAL RESPONDERS   |           | 117 |

## D10 Do you believe that national and international guidelines provide useful clinical indications to define disease control in CRSwNP in clinical practice?

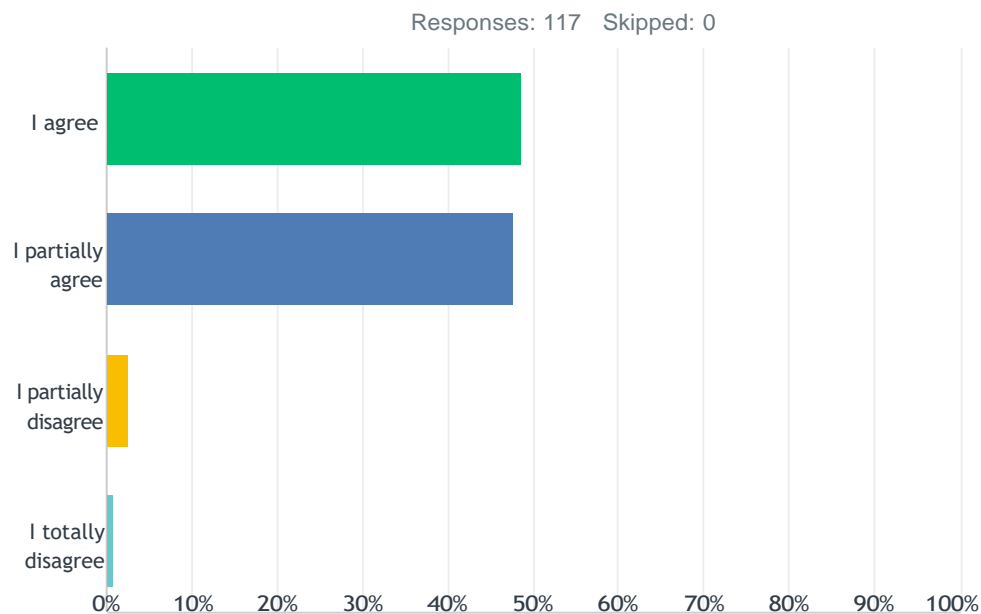

| RESPONSE OPTIONS     | RESPONSES |     |
|----------------------|-----------|-----|
| I agree              | 48.72%    | 57  |
| I partially agree    | 47.86%    | 56  |
| I partially disagree | 2.56%     | 3   |
| I totally disagree   | 0.85%     | 1   |
| TOTAL RESPONDERS     |           | 117 |

## D11 Do you apply the indications in the EPOS 2020 guidelines in clinical practice to evaluate disease control?

Responses: 117 Skipped: 0

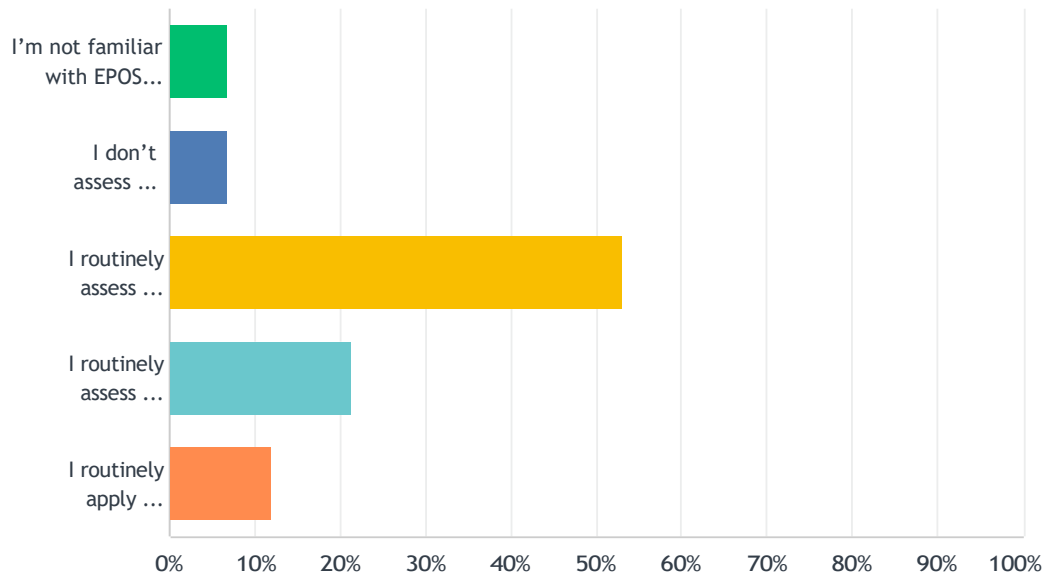

| RESPONSE OPTIONS                                                                           | RESPONSES |    |
|--------------------------------------------------------------------------------------------|-----------|----|
| I am not familiar with the EPOS 2020 guidelines                                            | 6.84%     | 8  |
| I do not assess disease control according to the EPOS 2020 guidelines in clinical practice | 6.84%     | 8  |
| I routinely assess disease control as suggested by EPOS 2020 in all patients with CRSwNP   | 52.99%    | 62 |
| I routinely assess disease control as suggested by EPOS 2020 in difficult to treat cases   | 21.37%    | 25 |
| I routinely apply disease control assessment in candidates for a biological treatment      | 11.97%    | 14 |
| TOTAL RESPONDERS                                                                           | 117       |    |

## D12 Do you apply the indications of EUFOREA in clinical practice to define severe uncontrolled disease?

Responses: 117

Skipped: 0

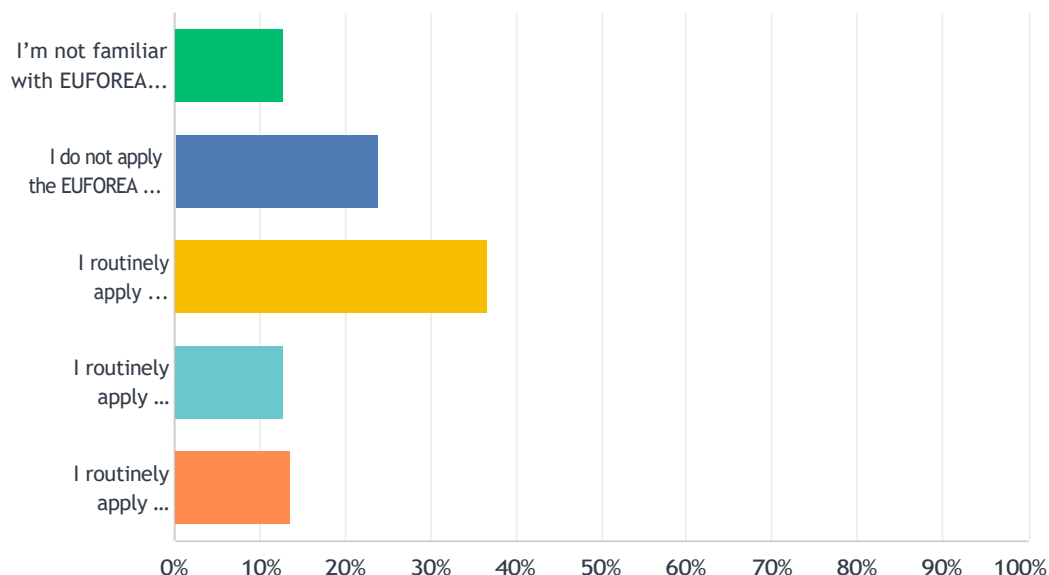

| RESPONSE OPTIONS                                                                                                            | RESPONSES |
|-----------------------------------------------------------------------------------------------------------------------------|-----------|
| I am not familiar with the EUFOREA guidelines                                                                               | 12.82% 15 |
| I do not apply the indications of EUFOREA to define severe uncontrolled disease in patients with CRSwNP                     | 23.93% 28 |
| I routinely apply the indications of EUFOREA to define severe uncontrolled disease in patients with CRSwNP                  | 36.75% 43 |
| I routinely apply the indications of EUFOREA to define severe uncontrolled disease in difficult to treat cases              | 12.82% 15 |
| I routinely apply the indications of EUFOREA to define severe uncontrolled disease in candidates for a biological treatment | 13.68% 16 |
| TOTAL RESPONDERS                                                                                                            | 117       |

## D13 In which aspects are GUIDELINES lacking considering the definition of non-control in CRSwNP? (Multiple answers possible)

Responses: 117 Skipped: 0

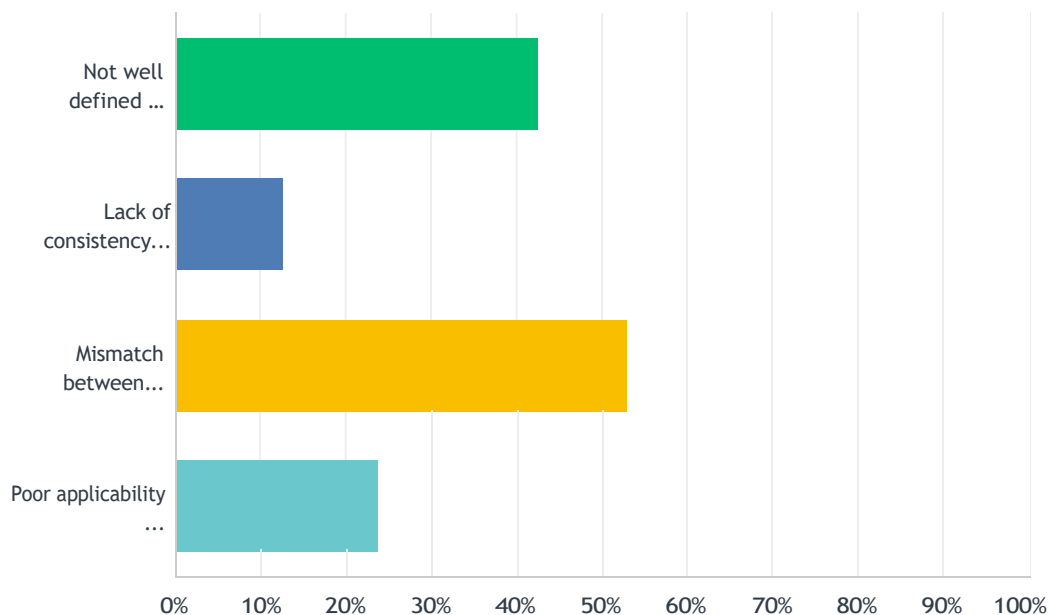

| RESPONSE OPTIONS                                                      | RESPONSES |     |
|-----------------------------------------------------------------------|-----------|-----|
| The characteristics of the uncontrolled patients are not well defined | 42.74%    | 50  |
| Lack of consistency between different sources                         | 12.82%    | 15  |
| Mismatch between cut-off scores                                       | 52.99%    | 62  |
| Poor applicability in clinical practice                               | 23.93%    | 28  |
| TOTAL RESPONDENTS                                                     |           | 117 |

## D14 Which of the following aspects can influence assessment of non-control in CRSwNP (multiple answers possible):

Responses: 117 Skipped: 0

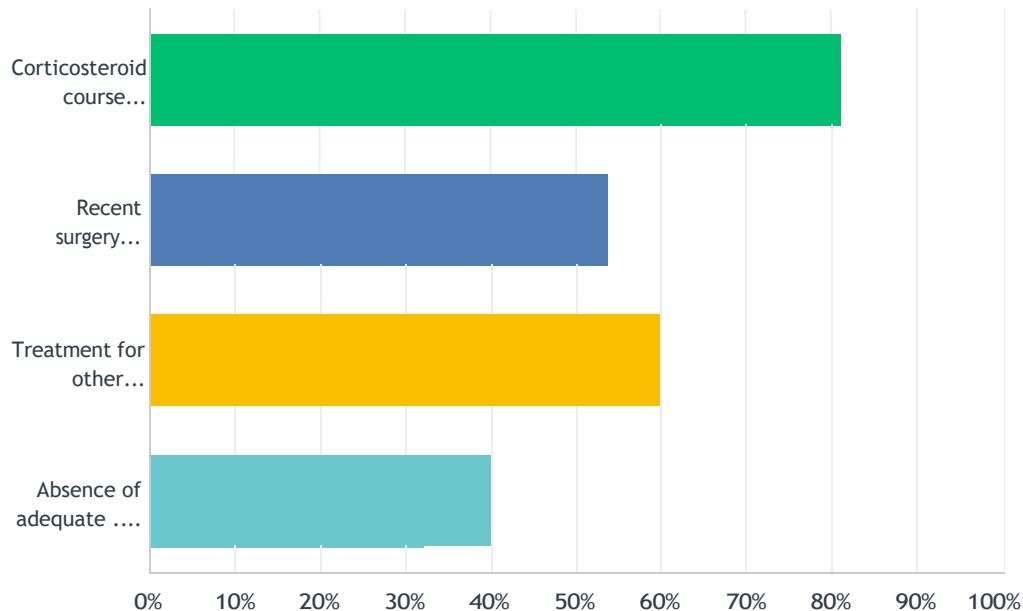

| RESPONSE OPTIONS                                             | RESPONSES |     |
|--------------------------------------------------------------|-----------|-----|
| Corticosteroid course close to or concurrent with evaluation | 81.20%    | 95  |
| Recent surgery                                               | 53.85%    | 63  |
| Treatment for other comorbidities (related or unrelated)     | 59.83%    | 70  |
| Absence of adequate diagnostic tools                         | 32.48%    | 38  |
| TOTAL RESPONDERS                                             |           | 117 |

## D15 Which of these criteria do you consider important in assessing disease control in CRSwNP in your clinical practice? (Multiple answers possible)

Responses: 117 Skipped: 0

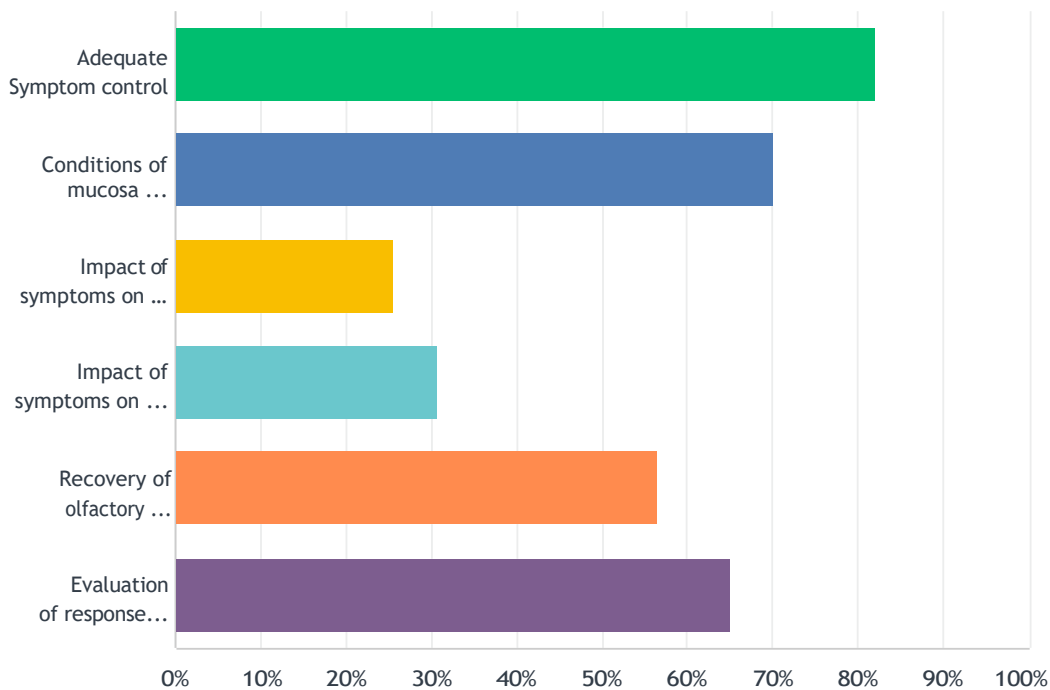

| RESPONSE OPTIONS                                                                                | RESPONSES  |
|-------------------------------------------------------------------------------------------------|------------|
| Adequate symptom control                                                                        | 82.05% 96  |
| Condition of mucosa assessed endoscopically (secretions and polypoid neoformations)             | 70.09% 82  |
| Impact of symptoms on sleep                                                                     | 25.64% 30  |
| Impact of symptoms on job performance                                                           | 30.77% 36  |
| Recovery of olfactory functionality                                                             | 56.41% 66  |
| Evaluation of response to previous treatments (corticosteroids, surgery o biological threapies) | 64.96% 76  |
| <b>TOTAL RESPONDERS</b>                                                                         | <b>117</b> |

## D16 In your clinical practice, which symptoms do you think are most important in defining non-control in CRSwNP? (Multiple answers possible)

Responses: 117 Skipped: 0

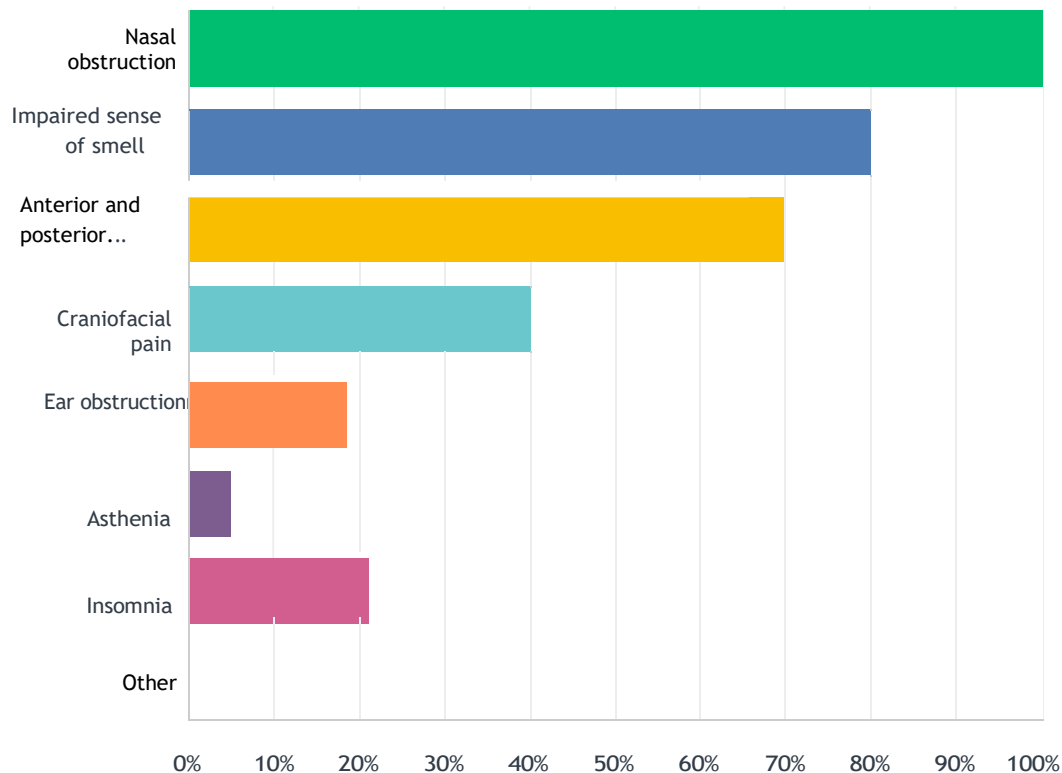

| RESPONSE OPTIONS                  | RESPONSES |     |
|-----------------------------------|-----------|-----|
| Nasal obstruction                 | 94.02%    | 110 |
| Impaired sense of smell           | 80.34%    | 94  |
| Anterior and posterior rhinorrhea | 64.96%    | 76  |
| Craniofacial pain                 | 41.03%    | 48  |
| Ear obstruction                   | 18.80%    | 22  |
| Asthenia                          | 5.13%     | 6   |
| Insomnia                          | 21.37%    | 25  |
| Other                             | 0.00%     | 0   |
| TOTAL RESPONDERS                  |           | 117 |



## D17 In your clinical practice, do you think it is important to have a well-defined score and a relative cut-off for each symptom that defines non-control in CRSwNP?

Responses: 117 Skipped: 0

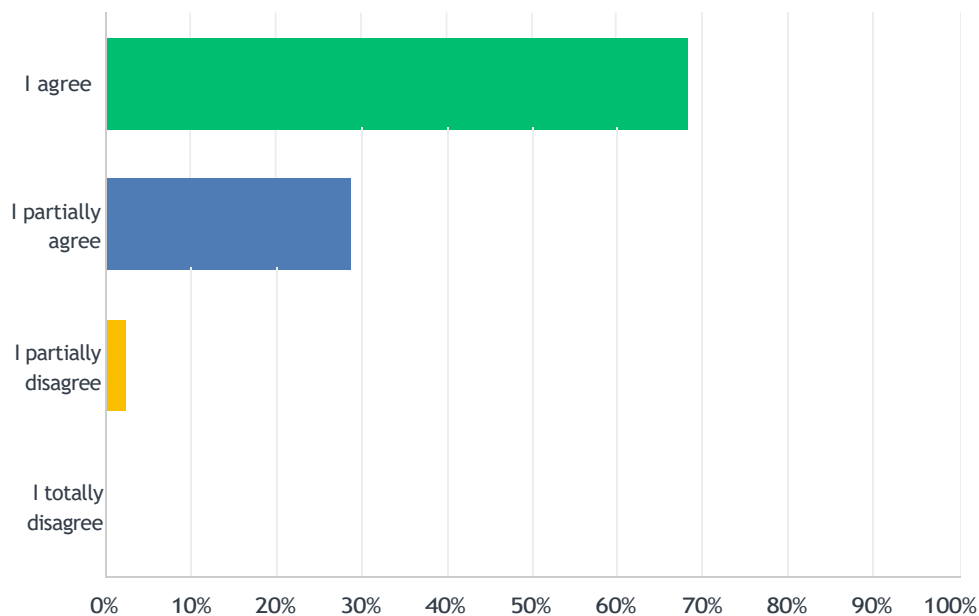

| RESPONSE OPTIONS     | RESPONSES |     |
|----------------------|-----------|-----|
| I agree              | 68.38%    | 80  |
| I partially agree    | 29.06%    | 34  |
| I partially disagree | 2.56%     | 3   |
| I totally disagree   | 0.00%     | 0   |
| TOTAL RESPONDERS     |           | 117 |

## D18 To what extent do you agree that the main symptoms to consider are nasal obstruction, rhinorrhea and smell, to define an uncontrolled patient?

Responses: 117 Skipped: 0

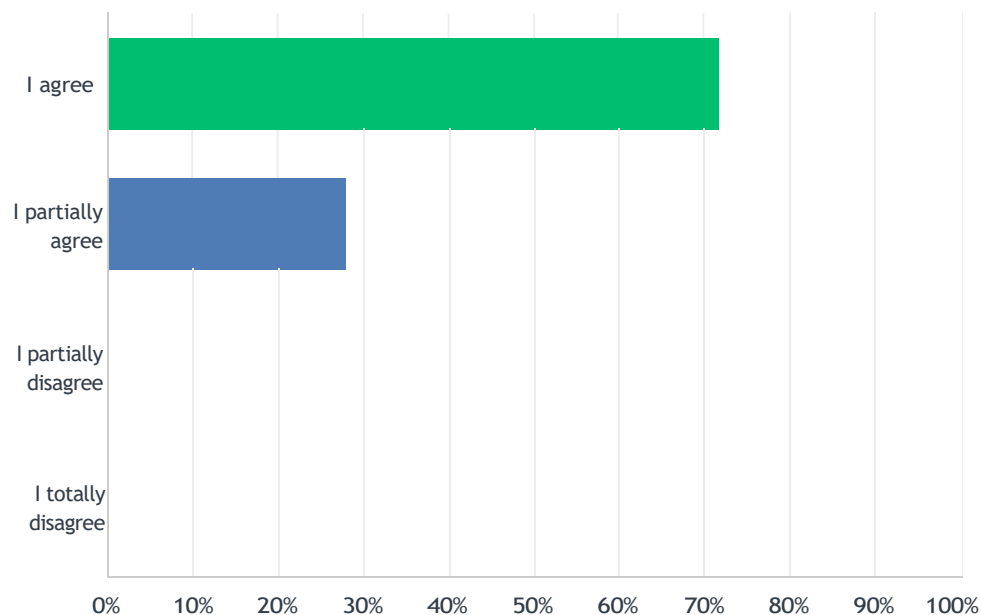

| RESPONSE OPTIONS     | RESPONSES |     |
|----------------------|-----------|-----|
| I agree              | 71.79%    | 84  |
| I partially agree    | 28.21%    | 33  |
| I partially disagree | 0.00%     | 0   |
| I totally disagree   | 0.00%     | 0   |
| TOTAL RESPONDERS     |           | 117 |

## D19 In your clinical practice, which aspects of QoL do you consider most important to define non-control in severe CRSwNP in surgically-naive patients (multiple answers possible):

Responses: 117 Skipped: 0

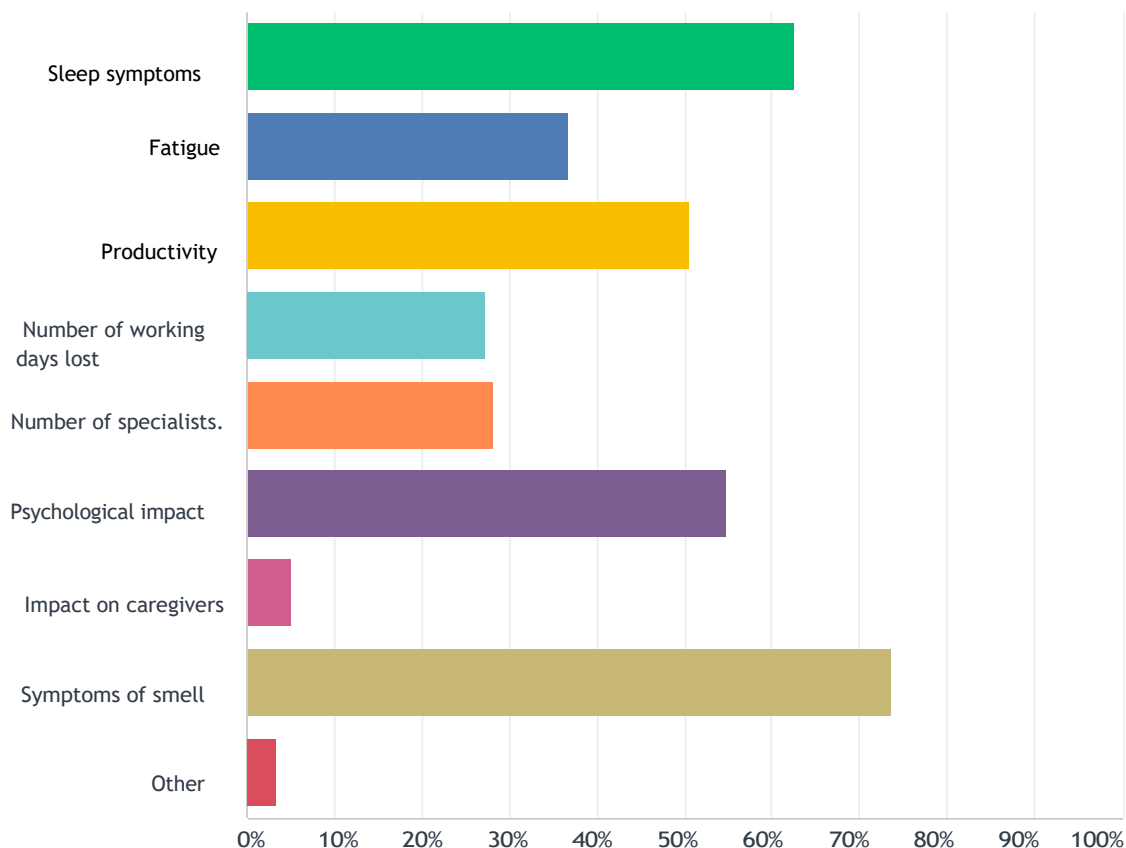

| RESPONSE OPTIONS                    | RESPONSES  |    |
|-------------------------------------|------------|----|
| Sleep symptoms                      | 62.39%     | 73 |
| Fatigue                             | 36.75%     | 43 |
| Productivity                        | 50.43%     | 59 |
| Number of working days lost         | 27.35%     | 32 |
| Number of specialist visit per year | 28.21%     | 33 |
| Psychological impact                | 54.70%     | 64 |
| Impact on caregivers                | 5.13%      | 6  |
| Symptoms of smell                   | 73.50%     | 86 |
| Other                               | 3.42%      | 4  |
| <b>TOTAL RESPONDERS</b>             | <b>117</b> |    |

## D20 Do you agree with the statement that the most important QoL aspects to consider in the specific evaluation of non-control are: asthenia, sleep quality and productivity at work? (Multiple answers possible)

Responses: 117 Skipped: 0

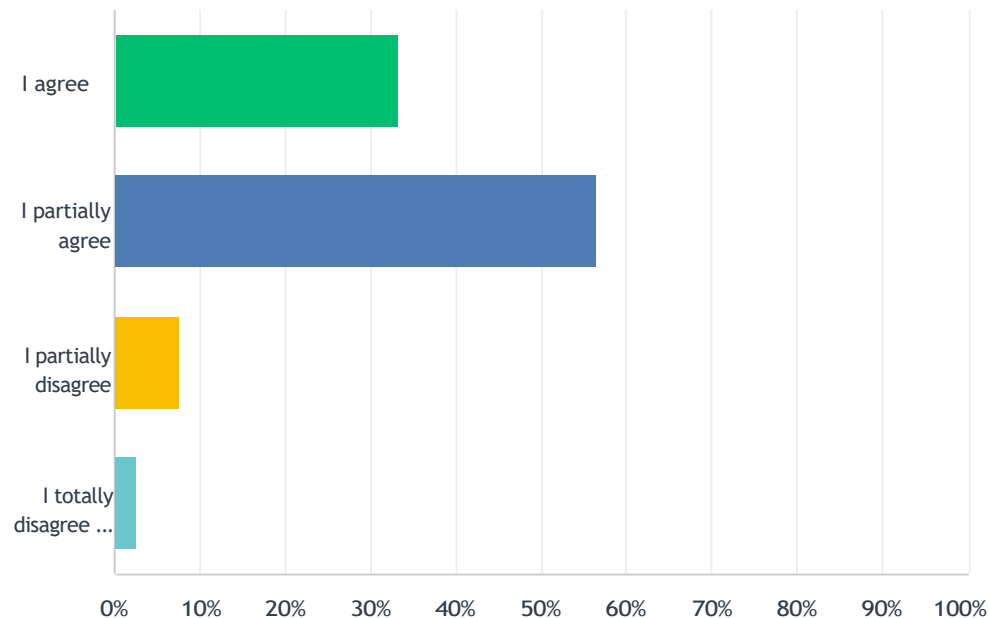

| RESPONSE OPTIONS     | RESPONSES |     |
|----------------------|-----------|-----|
| I agree              | 33.33%    | 39  |
| I partially agree    | 56.41%    | 66  |
| I partially disagree | 7.69%     | 9   |
| I totally disagree   | 2.56%     | 3   |
| TOTAL RESPONDERS     |           | 117 |

## D21 Which of the following parameters do you think can help in defining a severe uncontrolled form? (multiple)

Responses: 117 Skipped: 0

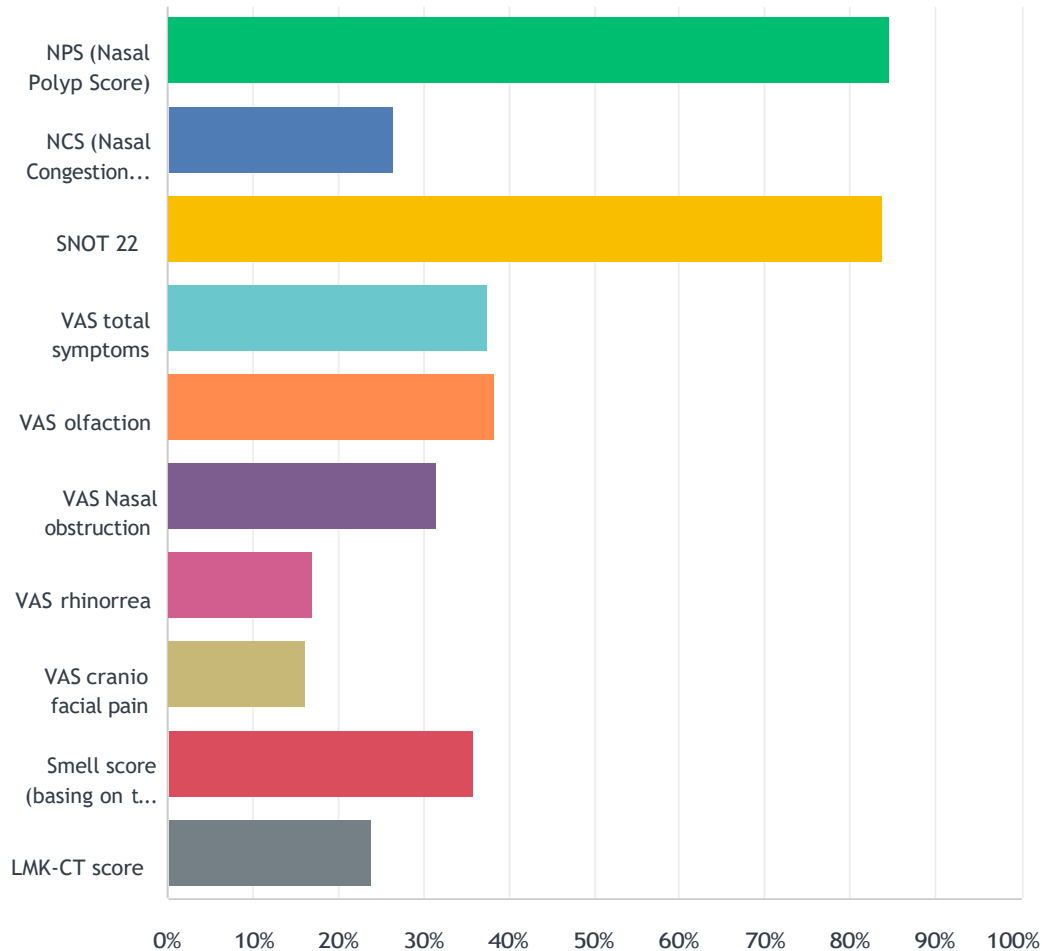

| RESPONSE OPTIONS                      | RESPONSES |     |
|---------------------------------------|-----------|-----|
| NPS (Nasal Polyp Score)               | 84.62%    | 99  |
| NCS (Nasal Congestion Score)          | 26.50%    | 31  |
| SNOT 22                               | 83.76%    | 98  |
| VAS total symptoms                    | 37.61%    | 44  |
| VAS olfaction                         | 38.46%    | 45  |
| VAS Nasal obstruction                 | 31.62%    | 37  |
| VAS rhinorrhea                        | 17.09%    | 20  |
| VAS cranio facial pain                | 16.24%    | 19  |
| Smell score (basing on the test used) | 35.90%    | 42  |
| LMK-CT score                          | 23.93%    | 28  |
| TOTAL RESPONDENTS                     |           | 117 |

## D22 Regarding NPS, which of these values do you think is the most suitable to define a severe uncontrolled form?

Responses: 117

Skipped: 0

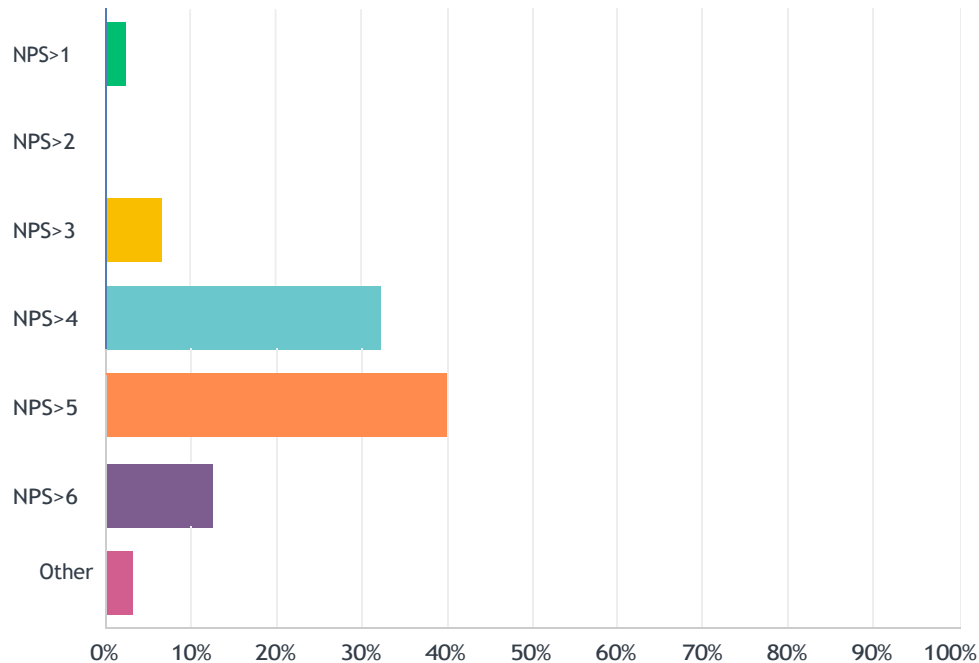

| RESPONSE OPTIONS | RESPONSES |     |
|------------------|-----------|-----|
| NPS>1            | 2.56%     | 3   |
| NPS>2            | 1.71%     | 2   |
| NPS>3            | 6.84%     | 8   |
| NPS>4            | 32.48%    | 38  |
| NPS>5            | 40.17%    | 47  |
| NPS>6            | 12.82%    | 15  |
| Other            | 3.42%     | 4   |
| TOTAL RESPONDERS |           | 117 |

## D23 Regarding SNOT-22 which of these values do you think is more suitable to define a severe uncontrolled form?

Responses: 117 Skipped: 0

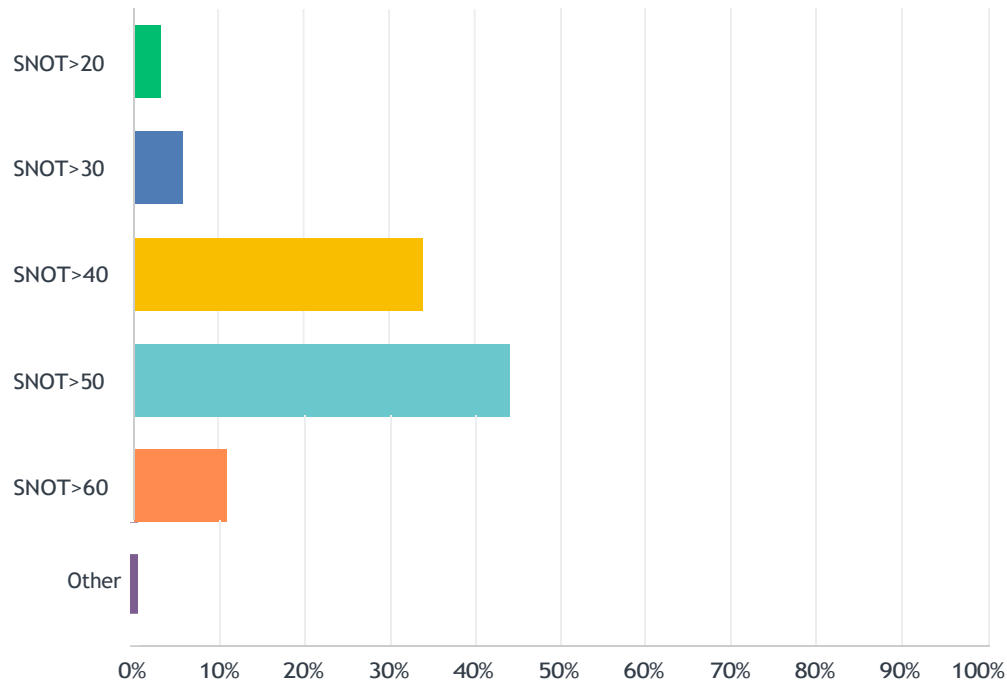

| RESPONSE OPTIONS | RESPONSES |     |
|------------------|-----------|-----|
| SNOT>20          | 3.42%     | 4   |
| SNOT>30          | 5.98%     | 7   |
| SNOT>40          | 34.19%    | 40  |
| SNOT>50          | 44.44%    | 52  |
| SNOT>60          | 11.11%    | 13  |
| Other            | 0.85%     | 1   |
| TOTAL RESPONDERS |           | 117 |



## D24 In assessing QoL with SNOT-22, non-specific sinus domains should be evaluated since they are closely related to disease

Responses: 117 Skipped: 0

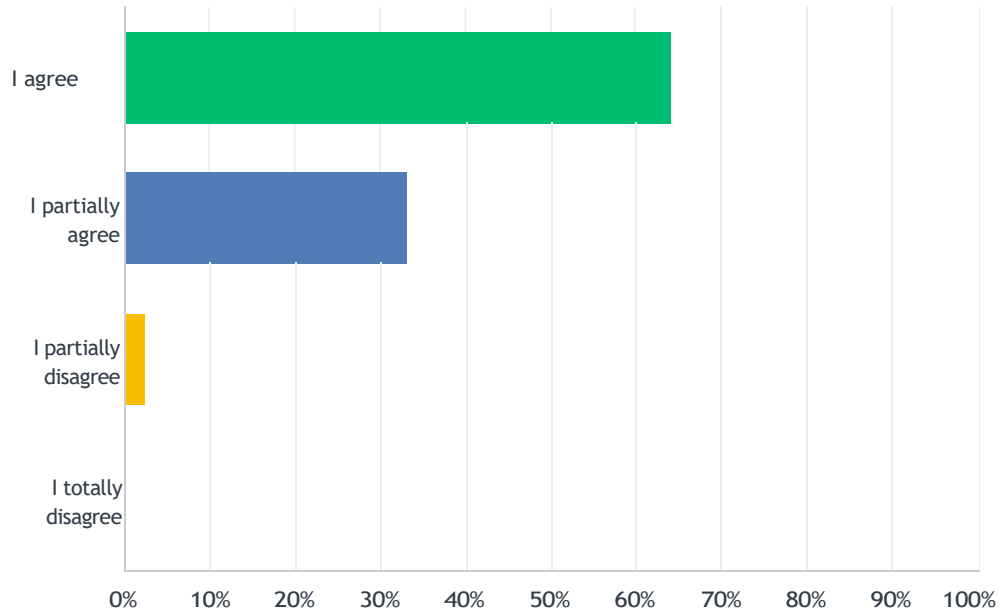

| RESPONSE OPTIONS     | RESPONSES |     |
|----------------------|-----------|-----|
| I agree              | 64.10%    | 75  |
| I partially agree    | 33.33%    | 39  |
| I partially disagree | 2.56%     | 3   |
| I totally disagree   | 0.00%     | 0   |
| TOTAL RESPONDERS     |           | 117 |

## D25 With regard to the NCS, which of these values do you think is most suitable for defining a severe, uncontrolled form?

Responses: 117 Skipped: 0

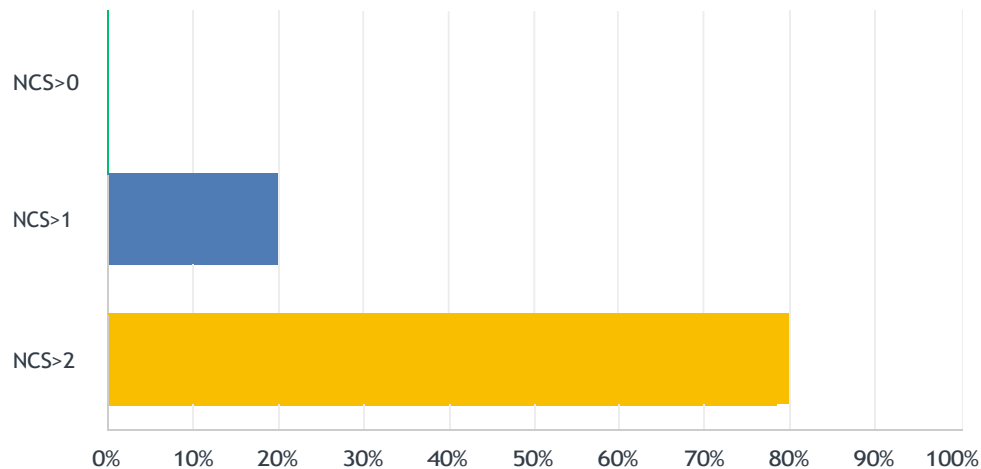

| RESPONSE OPTIONS | RESPONSES |     |
|------------------|-----------|-----|
| NCS>0            | 1.71%     | 2   |
| NCS>1            | 19.66%    | 23  |
| NCS>2            | 78.63%    | 92  |
| TOTAL RESPONDERS |           | 117 |

## D26 With regard to VAS total symptoms or specific for symptoms, which of these values do you think is more suitable to define a severe uncontrolled form?

Responses: 117 Skipped: 0

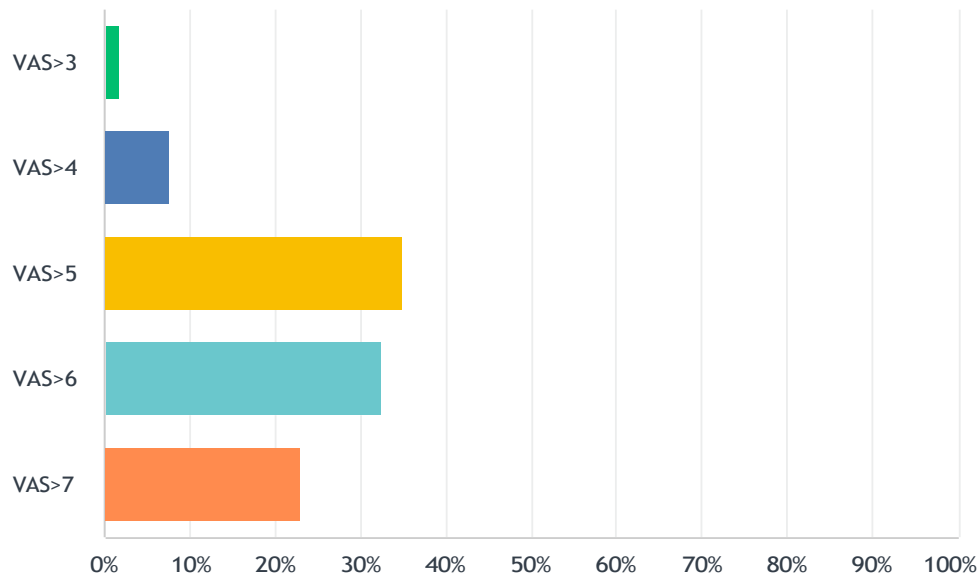

| RESPONSE OPTIONS | RESPONSES |     |
|------------------|-----------|-----|
| VAS>3            | 1.71%     | 2   |
| VAS>4            | 7.69%     | 9   |
| VAS>5            | 35.04%    | 41  |
| VAS>6            | 32.48%    | 38  |
| VAS>7            | 23.08%    | 27  |
| TOTAL RESPONDERS |           | 117 |

## D27 What do you think is the best way to assess olfaction during specific assessment for disease control? (multiple answers possible)

Responses: 117 Skipped: 0

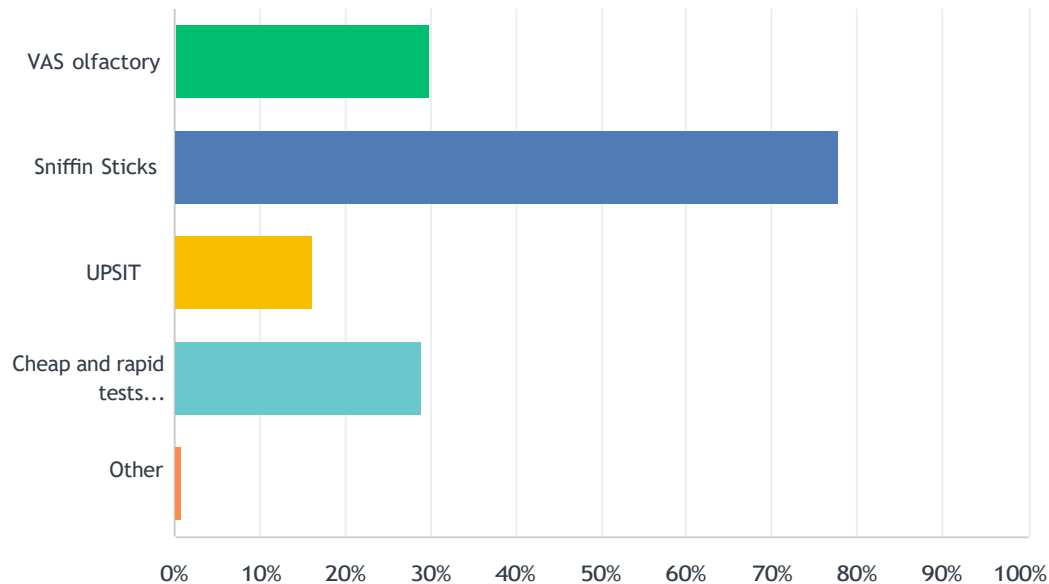

| RESPONSE OPTIONS                                | RESPONSES |     |
|-------------------------------------------------|-----------|-----|
| VAS olfactory                                   | 29.91%    | 35  |
| Sniffin Sticks                                  | 77.78%    | 91  |
| UPSIT                                           | 16.24%    | 19  |
| Cheap and rapid semi-objective tests are needed | 29.06%    | 34  |
| Other                                           | 0.85%     | 1   |
| TOTAL RESPONDERS                                |           | 117 |

## D28 Considering previous surgeries, what do you think it is necessary to assess? (multiple answers possible)

Responses: 117 Skipped: 0

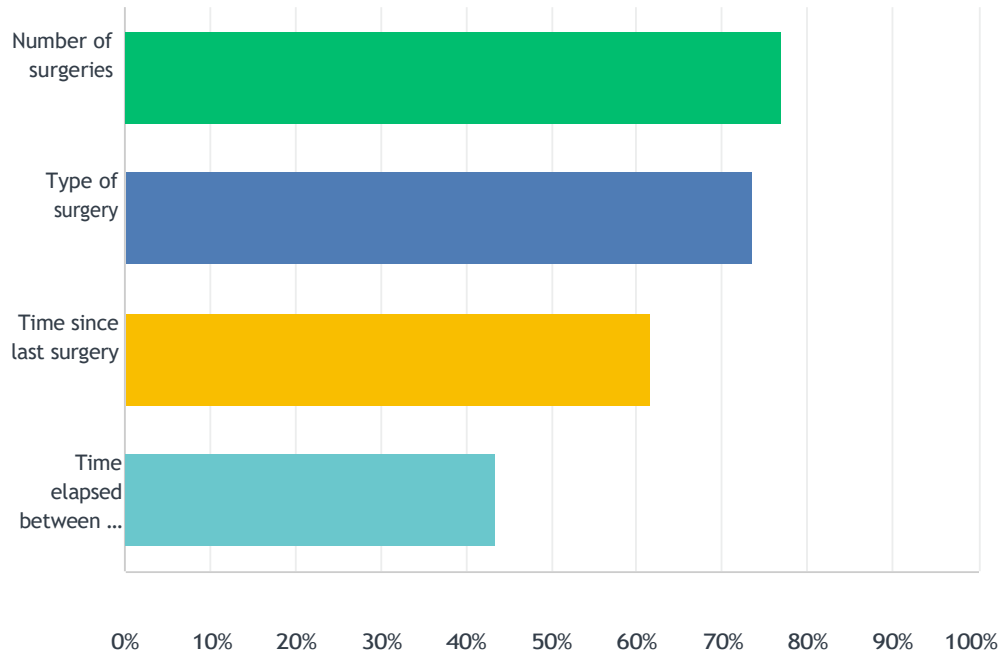

| RESPONSE OPTIONS                         | RESPONSES |     |
|------------------------------------------|-----------|-----|
| Number of surgeries                      | 76.92%    | 90  |
| Type of surgery                          | 73.50%    | 86  |
| Time since last surgery                  | 61.54%    | 72  |
| Time elapsed between different surgeries | 43.59%    | 51  |
| TOTAL RESPONDENTS                        |           | 117 |

## D29 What percentage of CRSwNP patients are uncontrolled after surgery in your practice?

Responses: 117 Skipped: 0

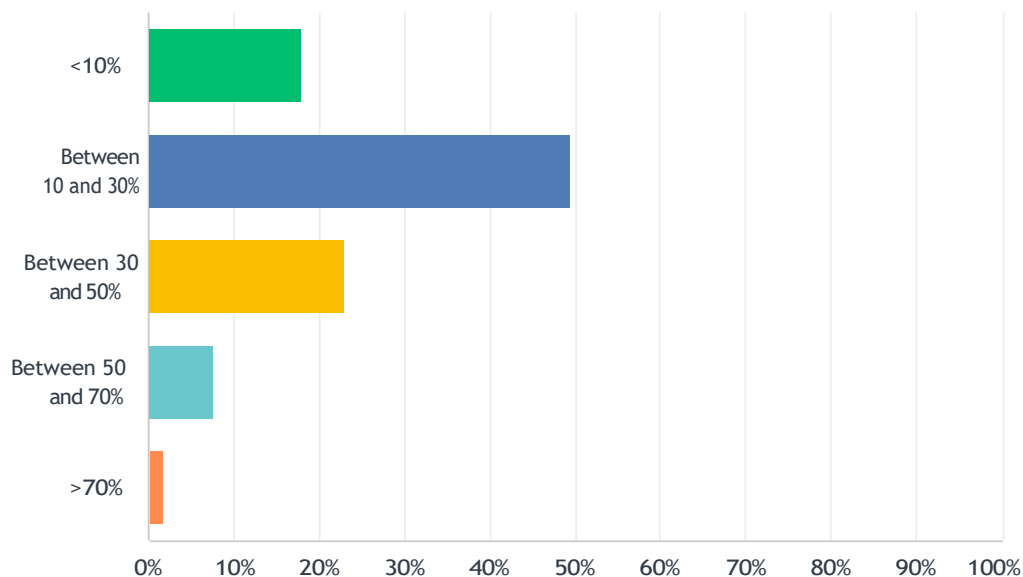

| RESPONSE OPTIONS   | RESPONSES |     |
|--------------------|-----------|-----|
| <10%               | 17.95%    | 21  |
| Between 10 and 30% | 49.57%    | 58  |
| Between 30 and 50% | 23.08%    | 27  |
| Between 50 and 70% | 7.69%     | 9   |
| >70%               | 1.71%     | 2   |
| TOTAL RESPONDERS   |           | 117 |

## D30 In your clinical practice, how long after the last intervention can it be held that surgery does not guarantee patient control?

Responses: 117 Skipped: 0

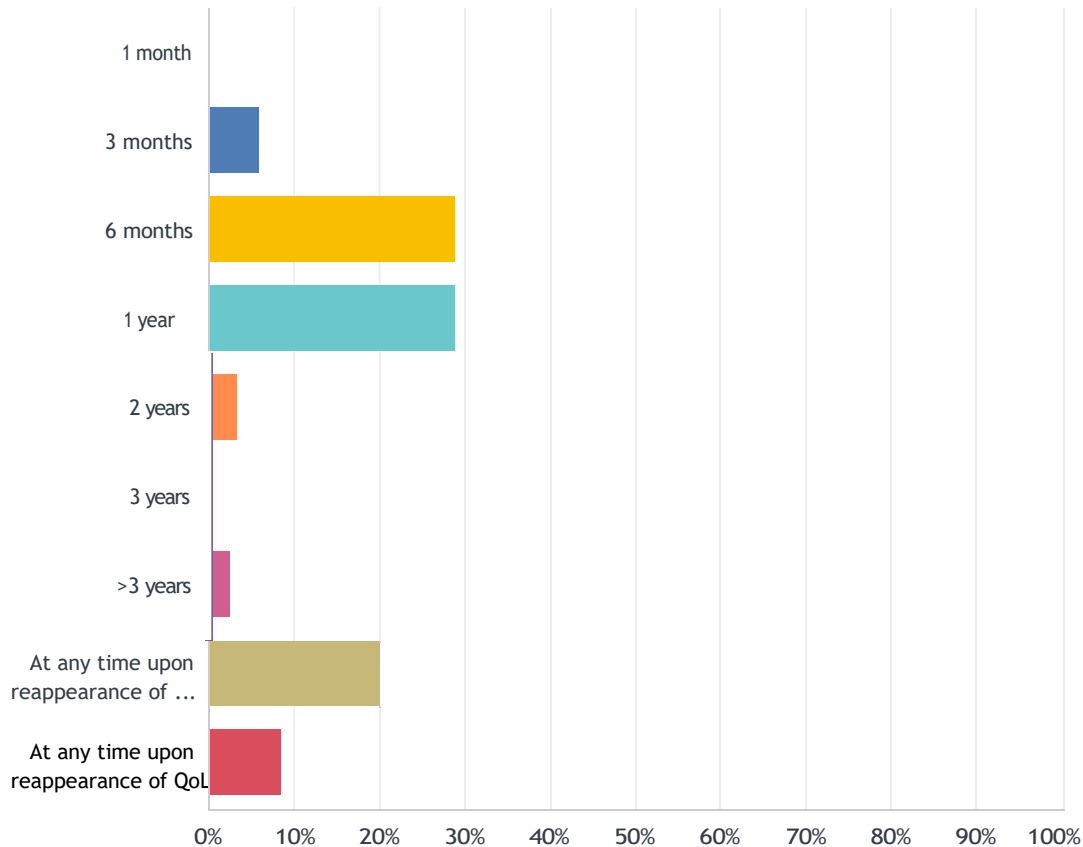

| RESPONSE OPTIONS                                                | RESPONSES |     |
|-----------------------------------------------------------------|-----------|-----|
| 1 month                                                         | 0.00%     | 0   |
| 3 months                                                        | 5.98%     | 7   |
| 6 months                                                        | 29.06%    | 34  |
| 1 year                                                          | 29.06%    | 34  |
| 2 years                                                         | 3.42%     | 4   |
| 3 years                                                         | 0.85%     | 1   |
| >3 years                                                        | 2.56%     | 3   |
| At any time upon reappearance of objectivity on endoscopy (NPS) | 20.51%    | 24  |
| At any time upon reappearance of QoL symptoms (SNOT 22)         | 8.55%     | 10  |
| TOTAL RESPONDERS                                                |           | 117 |

### D31 To what extent do you agree that a patient, to be defined as uncontrolled, must have received adequate surgical treatment?

Responses: 117 Skipped: 0

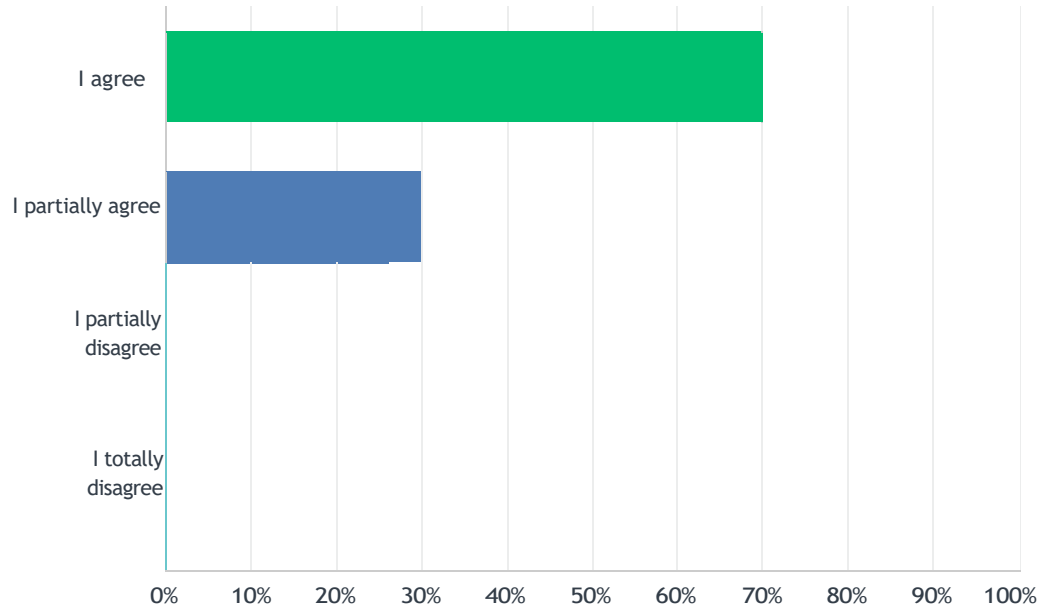

| RESPONSE OPTIONS     | RESPONSES |     |
|----------------------|-----------|-----|
| I agree              | 70.09%    | 82  |
| I partially agree    | 26.50%    | 31  |
| I partially disagree | 1.71%     | 2   |
| I totally disagree   | 1.71%     | 2   |
| TOTAL RESPONDERS     |           | 117 |



## D32 In your clinical practice, how do you define adequate surgical therapy?

Responses: 117 Skipped: 0

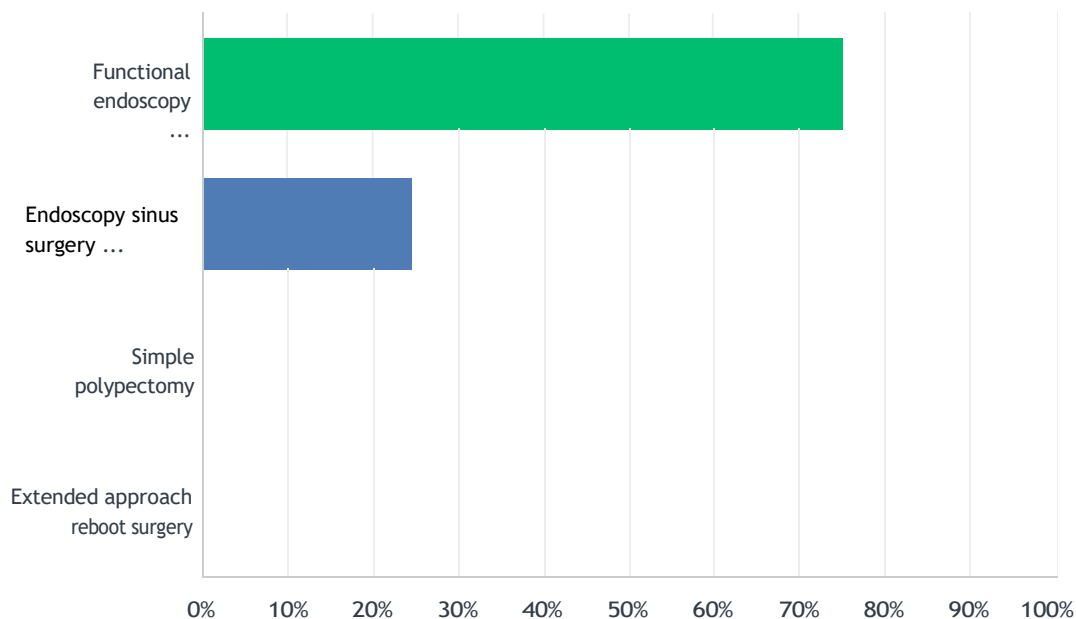

| RESPONSE OPTIONS                                                                     | RESPONSES |            |
|--------------------------------------------------------------------------------------|-----------|------------|
| Functional endoscopic sinus surgery with preservation of the middle turbinate (FESS) | 75.21%    | 88         |
| Endoscopic sinus surgery with removal of the middle turbinate (ESS)                  | 24.79%    | 29         |
| Simple polypectomy                                                                   | 0.00%     | 0          |
| Extended approach reboot surgery                                                     | 0.00%     | 0          |
| <b>TOTAL RESPONDERS</b>                                                              |           | <b>117</b> |

### D33 In your clinical practice, after how many operations can it be held that surgery does not ensure patient control?

Responses: 117 Skipped: 0

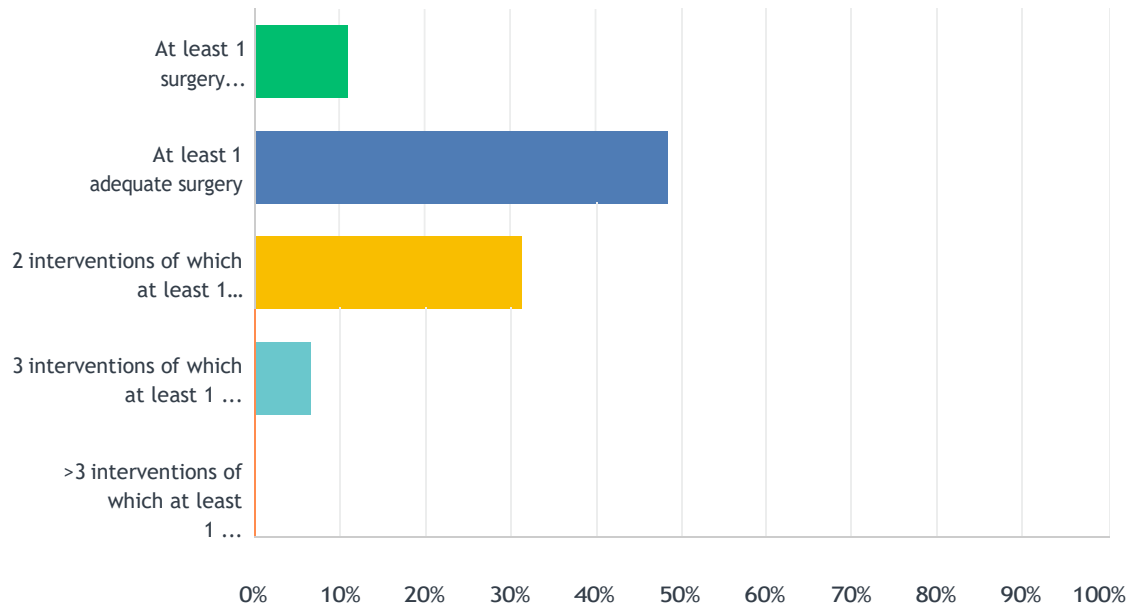

| RESPONSE OPTIONS                              | RESPONSES |     |
|-----------------------------------------------|-----------|-----|
| At least 1 surgery                            | 11.11%    | 13  |
| At least 1 adequate surgery                   | 48.72%    | 57  |
| 2 interventions of which at least 1 adequate  | 31.62%    | 37  |
| 3 interventions of which at least 1 adequate  | 6.84%     | 8   |
| >3 interventions of which at least 1 adequate | 1.71%     | 2   |
| TOTAL RESPONDERS                              |           | 117 |

## D34 In a patient who has already undergone at least one surgery, which NPS score can determine a state of non-control?

Responses: 117 Skipped: 0

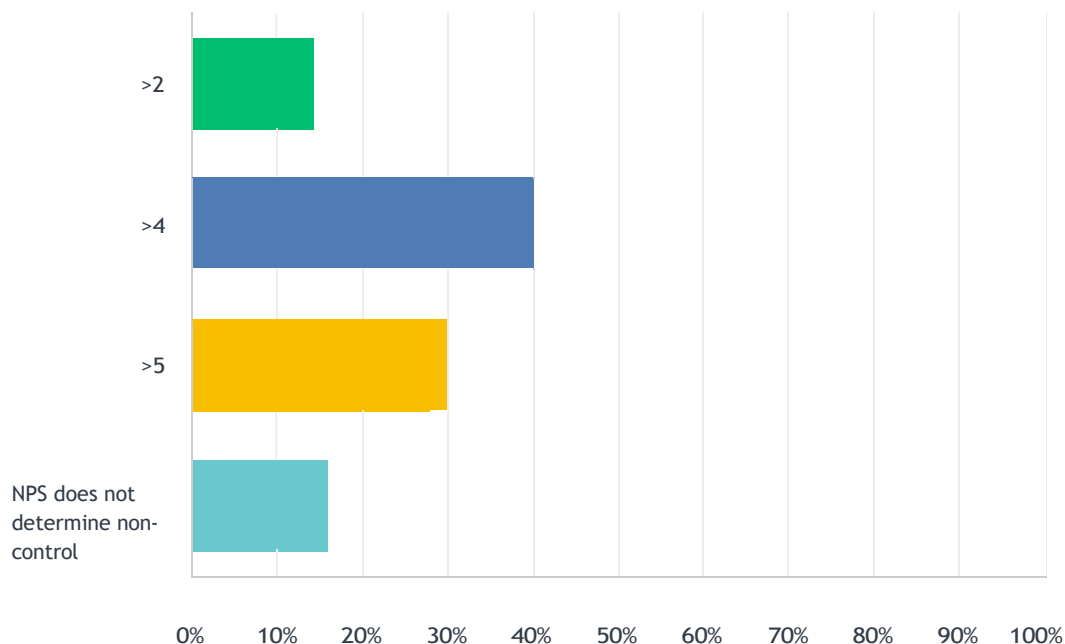

| RESPONSE OPTIONS                   | RESPONSES |     |
|------------------------------------|-----------|-----|
| >2                                 | 14.53%    | 17  |
| >4                                 | 41.03%    | 48  |
| >5                                 | 28.21%    | 33  |
| NPS does not determine non-control | 16.24%    | 19  |
| TOTAL RESPONDERS                   |           | 117 |

### D35 In your clinical practice what aspects associated with OCS treatment do you use to define non-control in severe CRSwNP patient who is naïve to surgical treatment? (Multiple answers possible)

Responses: 117 Skipped: 0

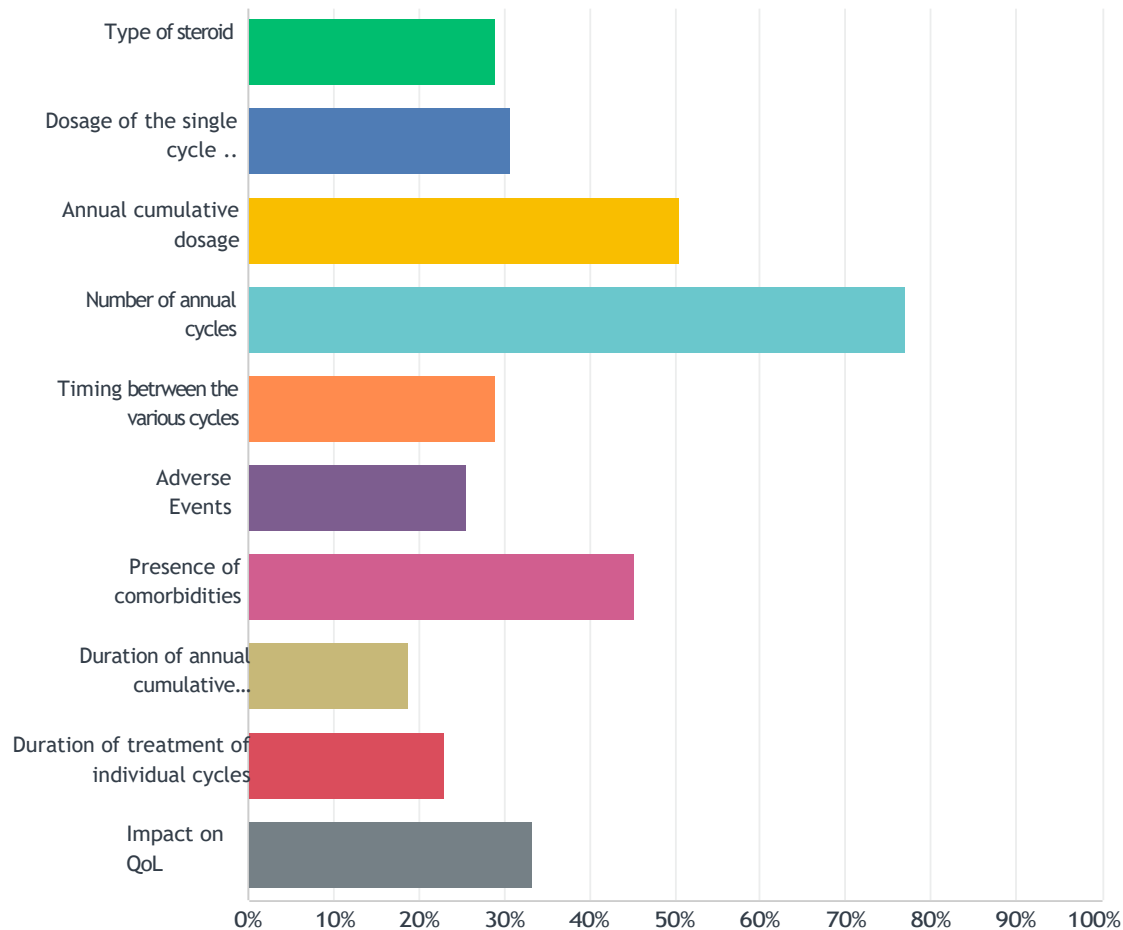

| RESPONSE OPTIONS                               | RESPONSES |     |
|------------------------------------------------|-----------|-----|
| Type of steroid                                | 29.06%    | 34  |
| Dosage of the single cycle                     | 30.77%    | 36  |
| Annual cumulative dosage                       | 50.43%    | 59  |
| Number of annual cycles                        | 76.92%    | 90  |
| Timing between the various cycles              | 29.06%    | 34  |
| Adverse Events                                 | 25.64%    | 30  |
| Presence of comorbidities                      | 45.30%    | 53  |
| Duration of annual cumulative treatment        | 18.80%    | 22  |
| Duration of treatment of the individual cycles | 23.08%    | 27  |
| Impact on QoL                                  | 33.33%    | 39  |
| TOTAL RESPONDENTS                              |           | 117 |

## D36 During disease control assessment when receiving INCS what do you think it is necessary... (multiple answers possible)

Responses: 117 Skipped: 0

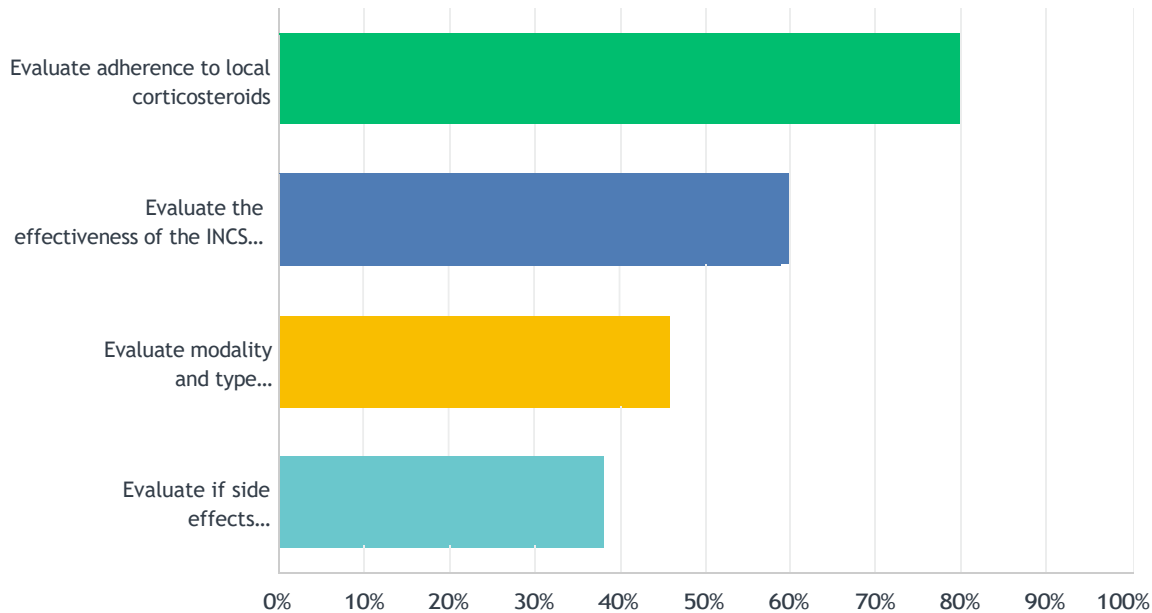

| RESPONSE OPTIONS                                               | RESPONSES |     |
|----------------------------------------------------------------|-----------|-----|
| Evaluate adherence to local corticosteroid                     | 79.49%    | 93  |
| Evaluate the effectiveness of the INCS after at least 2 months | 58.97%    | 69  |
| Evaluate modality and type of the corticosteroid taken         | 46.15%    | 54  |
| Evaluate if side effects or contraindications have limited use | 38.46%    | 45  |
| TOTAL RESPONDENTS                                              |           | 117 |

## D37 With regard to the evaluation of previous cortisone cycles per os, you consider the disease uncontrolled ...

Resposes: 117 Skipped: 0

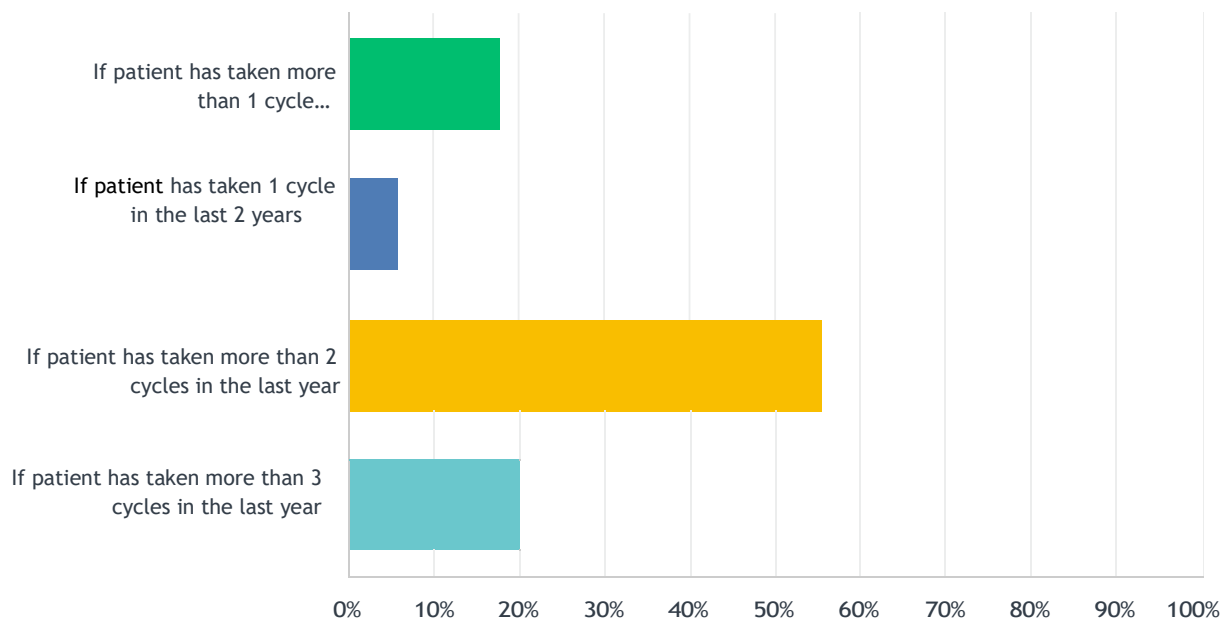

| RESPONSE OPTIONS                                         | RESPONSES |     |
|----------------------------------------------------------|-----------|-----|
| If patient has taken more than 1 cycle in the last year  | 17.95%    | 21  |
| If patient has taken 1 cycle in the last year two years  | 5.98%     | 7   |
| If patient has taken more than 2 cycles in the last year | 55.56%    | 65  |
| If patient has taken more than 3 cycles in the last year | 20.51%    | 24  |
| TOTAL RESPONDENTS                                        |           | 117 |

## D38 Do you agree that any complications related to the excessive use of corticosteroids (e.g. adrenal insufficiency, etc...) should be investigated in the evaluation of non-control?

Responses: 117 Skipped: 0

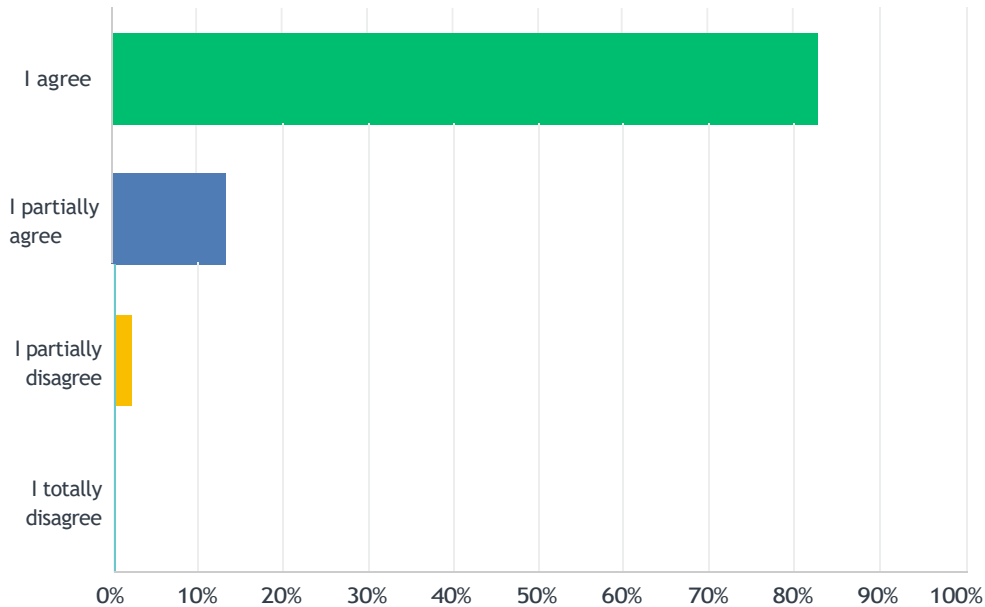

| RESPONSE OPTIONS     | RESPONSES |     |
|----------------------|-----------|-----|
| I agree              | 82.91%    | 97  |
| I partially agree    | 13.68%    | 16  |
| I partially disagree | 2.56%     | 3   |
| I totally disagree   | 0.85%     | 1   |
| TOTAL RESPONDERS     |           | 117 |



## D39 In disease control evaluation of systemic corticosteroid, the following courses should be considered:

Responses: 117 Skipped: 0

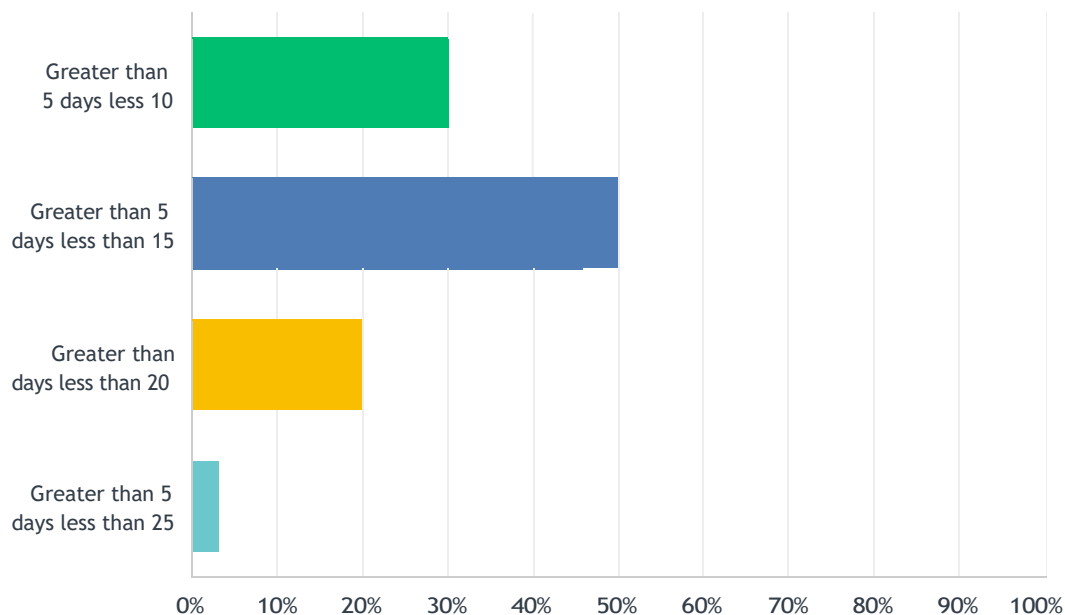

| RESPONSE OPTIONS                 | RESPONSES |     |
|----------------------------------|-----------|-----|
| Greater than 5 days less than 10 | 30.77%    | 36  |
| Greater than 5 days less than 15 | 46.15%    | 54  |
| Greater than 5 days less than 20 | 19.66%    | 23  |
| Greater than 5 days less than 25 | 3.42%     | 4   |
| TOTAL RESPONDERS                 |           | 117 |

## D40 Regarding previous biological treatments, do you think that the disease control (multiple answers possible):

Responses: 117 Skipped: 0

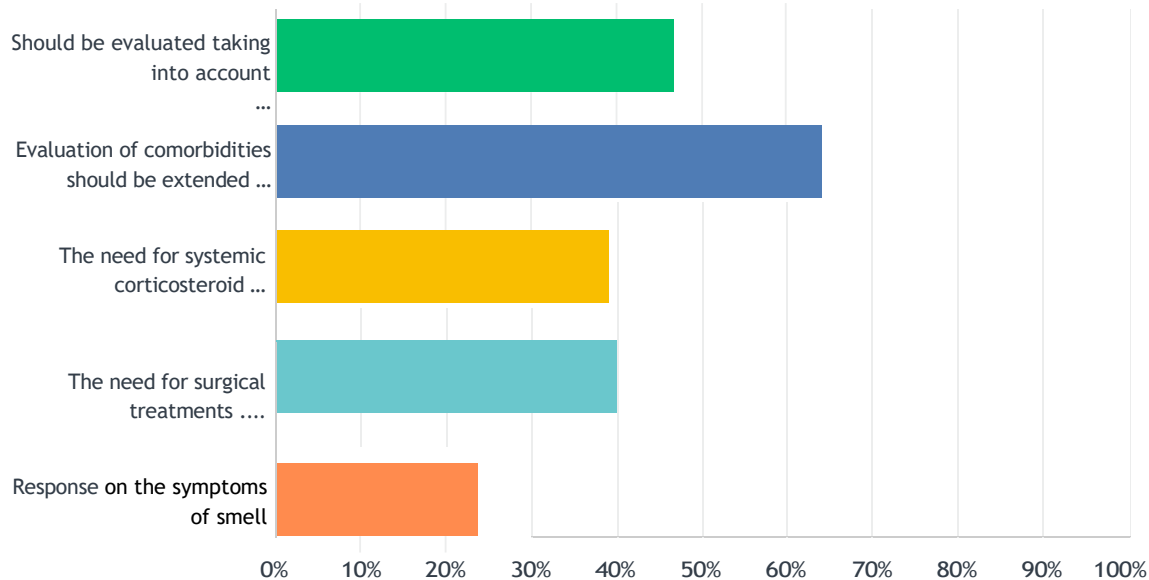

| RESPONSE OPTIONS                                                                        | RESPONSES |            |
|-----------------------------------------------------------------------------------------|-----------|------------|
| Should be evaluated taking into consideration the same criteria listed above            | 47.01%    | 55         |
| Evaluation of associated comorbidities should be extended to disease control            | 64.10%    | 75         |
| The need for systemic corticosteroid therapy should be assessed during biologic therapy | 39.32%    | 46         |
| The need for surgical treatment should be assessed during biologic therapy              | 40.17%    | 47         |
| It is necessary to evaluate response on the symptoms of smell                           | 23.93%    | 28         |
| <b>TOTAL RESPONDERS</b>                                                                 |           | <b>117</b> |

## D41 Do you think it would be useful to have a reference grid as suggested by national disease control guidelines?

Responses: 117 Skipped: 0

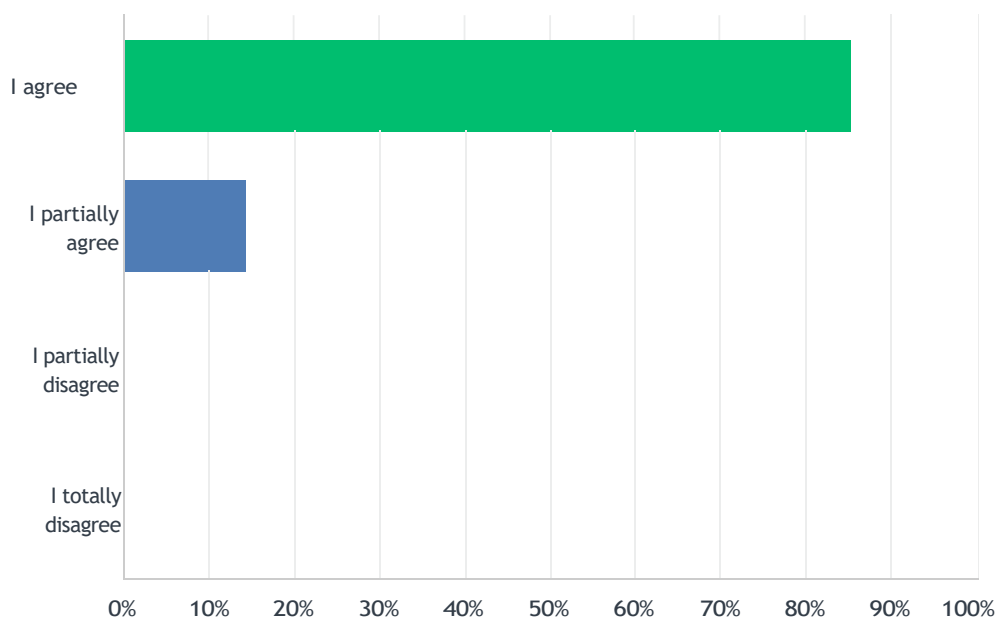

| RESPONSE OPTIONS     | RESPONSES |     |
|----------------------|-----------|-----|
| I agree              | 85.47%    | 100 |
| I partially agree    | 14.53%    | 17  |
| I partially disagree | 0.00%     | 0   |
| I totally disagree   | 0.00%     | 0   |
| TOTAL RESPONDERS     |           | 117 |

## D42 In your clinical practice, what other pathologies do you consider as an additional element to define non-control in severe CRSwNP? (Multiple answers possible)

Responses: 117 Skipped: 0

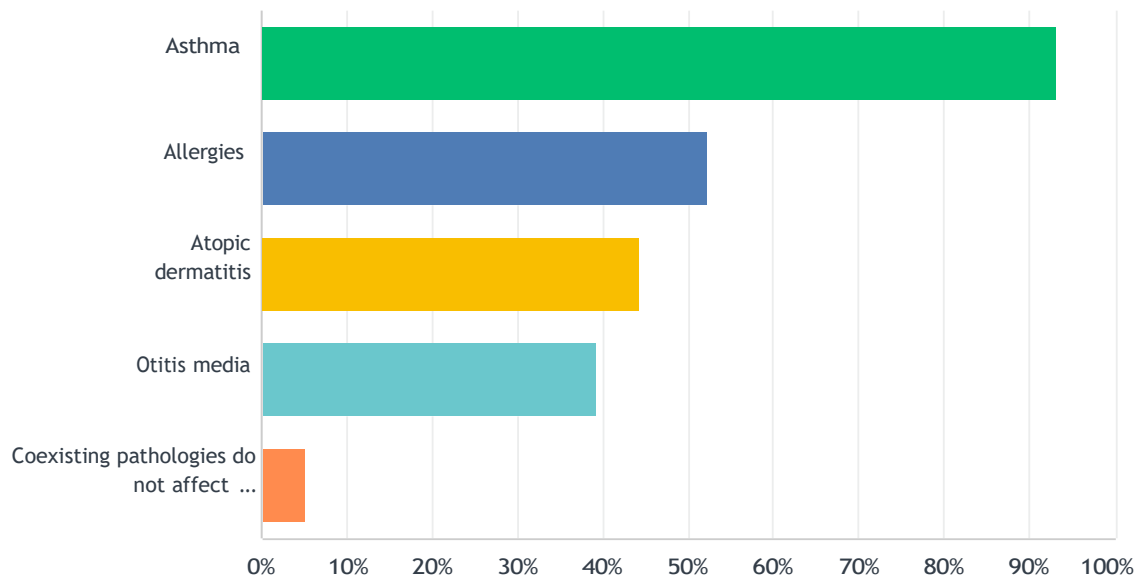

| RESPONSE OPTIONS                                                | RESPONSES |            |
|-----------------------------------------------------------------|-----------|------------|
| Asthma                                                          | 93.16%    | 109        |
| Allergies                                                       | 52.14%    | 61         |
| Atopic dermatitis                                               | 44.44%    | 52         |
| Otitis media                                                    | 39.32%    | 46         |
| Coexisting pathologies do not affect uncontrolled severe CRSwNP | 5.13%     | 6          |
| <b>TOTAL RESPONSES</b>                                          |           | <b>117</b> |

## D43 In patients with asthma as a coexisting disease, asthma control also needs to be defined in your practice

Responses: 117 Skipped: 0

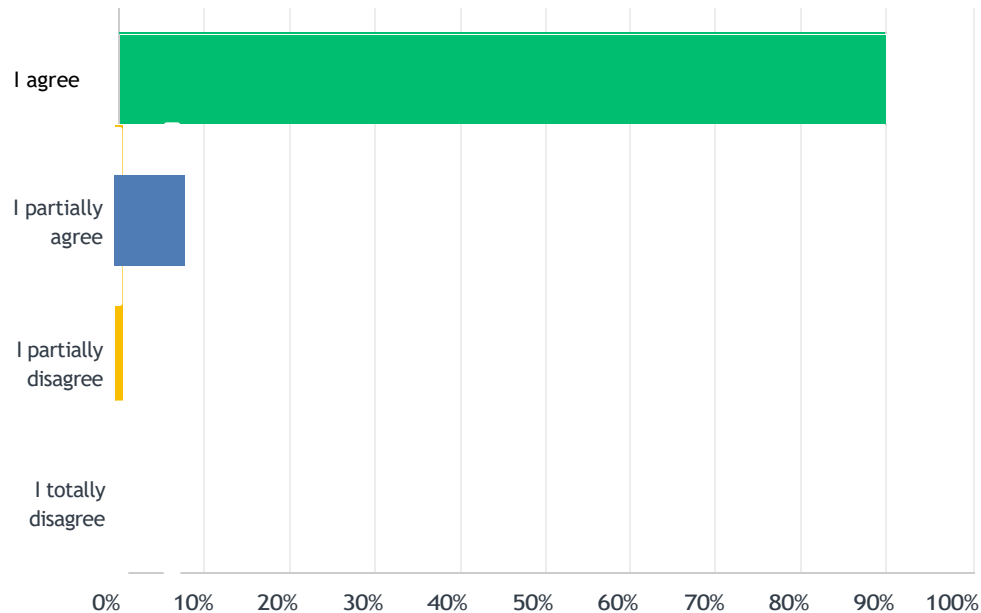

| RESPONSE OPTIONS     | RESPONSES |     |
|----------------------|-----------|-----|
| I agree              | 90.60%    | 106 |
| I partially agree    | 8.55%     | 10  |
| I partially disagree | 0.85%     | 1   |
| I totally disagree   | 0.00%     | 0   |
| TOTAL RESPONDERS     |           | 117 |

## D44 Assessment by pulmonary specialists is important to assess asthma control

Responses: 117 Skipped: 0

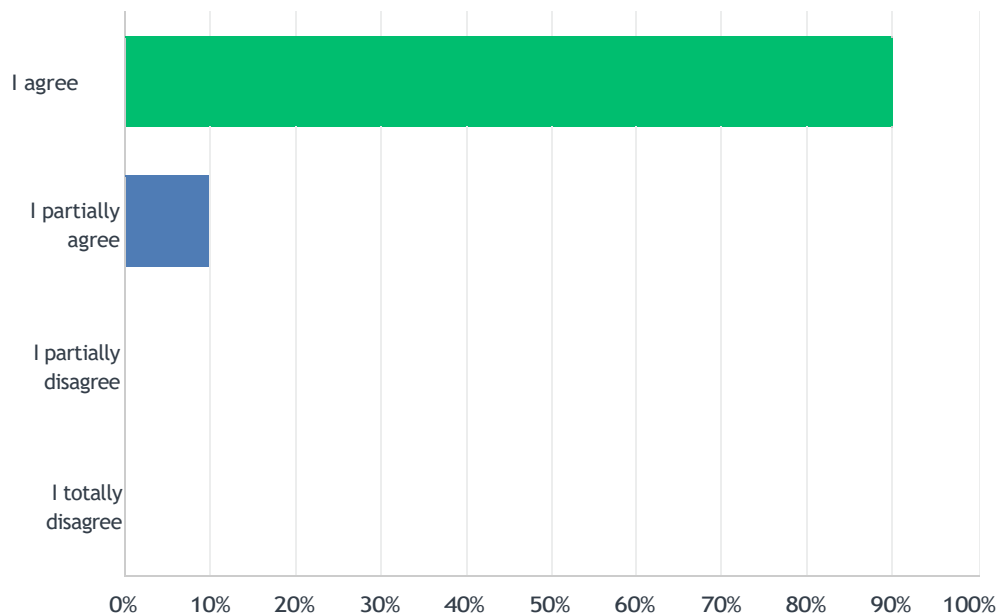

| RESPONSE OPTIONS     | RESPONSES |     |
|----------------------|-----------|-----|
| I agree              | 90.60%    | 106 |
| I partially agree    | 9.40%     | 11  |
| I partially disagree | 0.00%     | 0   |
| I totally disagree   | 0.00%     | 0   |
| TOTAL RESPONDERS     |           | 117 |

## D45 Assessment of asthma and CRSwNP should be the subject of multidisciplinary discussion

Responses: 117 Skipped: 0

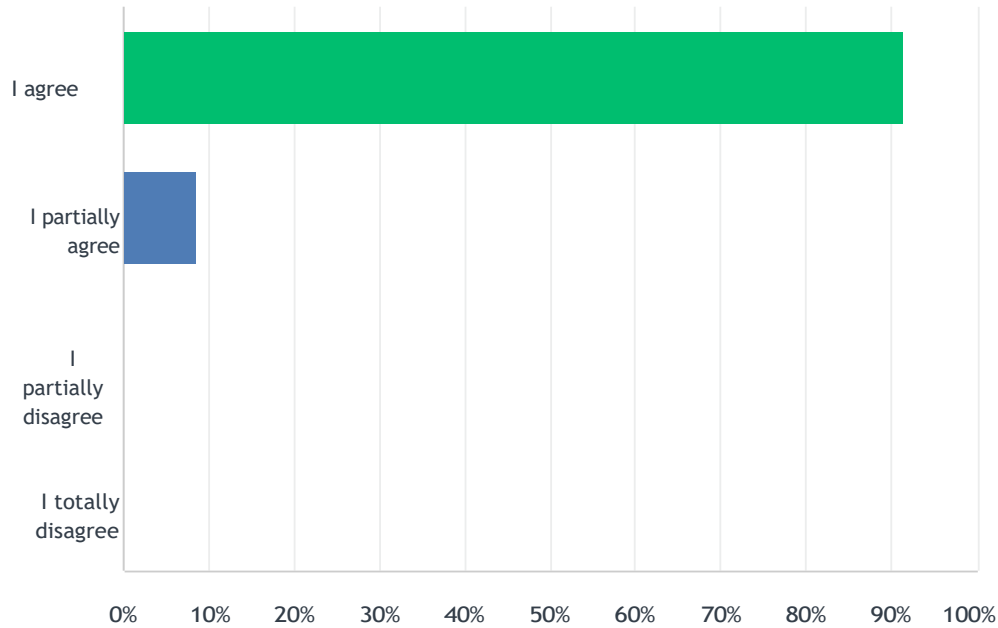

| RESPONSE OPTIONS     | RESPONSES |     |
|----------------------|-----------|-----|
| I agree              | 91.45%    | 107 |
| I partially agree    | 8.55%     | 10  |
| I partially disagree | 0.00%     | 0   |
| I totally disagree   | 0.00%     | 0   |
| TOTAL RESPONDERS     |           | 117 |

## D46 It is important to have a therapeutic strategy that allows for control of both asthma and CRSwNP

Responses: 117

Skipped: 0

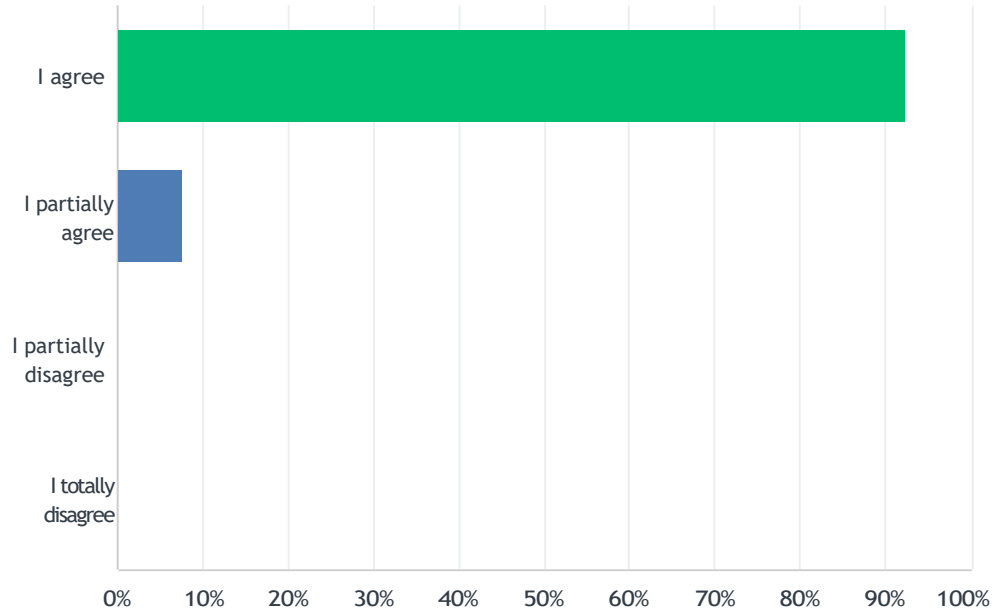

| RESPONSE OPTIONS     | RESPONSES |     |
|----------------------|-----------|-----|
| I agree              | 92.31%    | 108 |
| I partially agree    | 7.69%     | 9   |
| I partially disagree | 0.00%     | 0   |
| I totally disagree   | 0.00%     | 0   |
| TOTAL RESPONDERS     |           | 117 |
